# Supplementary material
Source: publisher site journal article supplement (https://www.dovepress.com/article/321443)
Supplement: Supplementary file 1 [file get_supplementary_file.php]

| **VFclass** | **Virulence factors** | **Related genes** | **MS6396(Prediction)** | **E.coli 55989(EAEC)** | | **E.coli CFT073(UPEC)** | **E.coli NA114(UPEC)** | **E.coli O157:H7 str. EDL933(EHEC)** | | **E.coli O25b:H4-ST131(UPEC)** | **E.coliO44:H18042(EAEC)** | |
| --- | --- | --- | --- | --- | --- | --- | --- | --- | --- | --- | --- | --- |
| **draft (draft)** | **55989p (NC_011752)** | **chromosome (NC_011748)** | **chromosome (NC_004431)** | **chromosome (NC_017644)** | **pO157 (NC_007414)** | **chromosome (NC_002655)** | **chromosome (NZ_HG941718)** | **chromosome (NC_017626)** | **pAA (NC_017627)** |
| Adherence | AAF/II fimbriae | aafA | - | - | - | - | - | - | - | - | - | EC042_pAA048 |
| aafB | - | - | - | - | - | - | - | - | - | EC042_pAA030 |
| aafC | - | - | - | - | - | - | - | - | - | EC042_pAA031 |
| aafD | - | - | - | - | - | - | - | - | - | EC042_pAA046 |
| AAF/III fimbriae | agg3A | - | pEC55989_0087 | - | - | - | - | - | - | - | - |
| agg3B | - | pEC55989_0086 | - | - | - | - | - | - | - | - |
| agg3C | - | pEC55989_0085 | - | - | - | - | - | - | - | - |
| agg3D | - | pEC55989_0084 | - | - | - | - | - | - | - | - |
| Afimbrial adhesin AFA-I | afaA | - | - | - | - | - | - | - | EC958_4102 | - | - |
| afaB | - | - | - | - | - | - | - | EC958_4101 | - | - |
| afaC | - | - | - | - | - | - | - | EC958_4100 | - | - |
| afaD | - | - | - | - | - | - | - | EC958_4099 | - | - |
| afaE | - | - | - | - | - | - | - | - | - | - |
| draP | - | - | - | - | - | - | - | EC958_4098 | - | - |
| CFA/I fimbriae | cfaA | - | - | EC55989_3511 | - | - | - | - | - | - | - |
| cfaB | - | - | EC55989_3510 | - | - | - | - | - | - | - |
| cfaC | - | - | EC55989_3509 | - | - | - | - | - | - | - |
| cfaD/cfaE | - | - | EC55989_3508 | - | - | - | - | - | - | - |
| Curli fibers | cgsD | - | - | - | - | - | - | - | EC958_1231 | - | - |
| cgsE | - | - | - | - | - | - | - | EC958_1230 | - | - |
| cgsF | - | - | - | - | - | - | - | EC958_1229 | - | - |
| cgsG | - | - | - | - | - | - | - | EC958_1228 | - | - |
| csgA | - | - | - | - | - | - | - | EC958_1234 | - | - |
| csgB | - | - | - | - | - | - | - | EC958_1233 | - | - |
| csgC | - | - | - | - | - | - | - | EC958_1235 | - | - |
| Dispersin | aap | - | - | - | - | - | - | - | - | - | EC042_pAA055 |
| **VFclass** | **Virulence factors** | **Related genes** | **MS6396(Prediction)** | **E.coli O45:K1:H7 str. S88(NMEC)** | | **E.coli O83:H1 str. NRG 857C(AIEC)** | | **E.coli UM146(AIEC)** | | **E.coli VR50(UPEC)** | |
| **draft (draft)** | **pECOS88 (NC_011747)** | **chromosome (NC_011742)** | **pO83_CORR (NC_017659)** | **chromosome (NC_017634)** | **plamsid pUM146 (NC_017630)** | **chromosome (NC_017632)** | **chromosome (NZ_CP011134)** | **pVR50B (NZ_CP011136)** |
| Adherence | AAF/II fimbriae | aafA | - | - | - | - | - | - | - | - | - |
| aafB | - | - | - | - | - | - | - | - | - |
| aafC | - | - | - | - | - | - | - | - | - |
| aafD | - | - | - | - | - | - | - | - | - |
| AAF/III fimbriae | agg3A | - | - | - | - | - | - | - | - | - |
| agg3B | - | - | - | - | - | - | - | - | - |
| agg3C | - | - | - | - | - | - | - | - | - |
| agg3D | - | - | - | - | - | - | - | - | - |
| Afimbrial adhesin AFA-I | afaA | - | - | - | - | - | - | - | ECVR50_3238 | - |
| afaB | - | - | - | - | - | - | - | ECVR50_3237 | - |
| afaC | - | - | - | - | - | - | - | ECVR50_3236 | - |
| afaD | - | - | - | - | - | - | - | ECVR50_3235 | - |
| afaE | - | - | - | - | - | - | - | ECVR50_3233 | - |
| draP | - | - | - | - | - | - | - | ECVR50_3234 | - |
| CFA/I fimbriae | cfaA | - | - | - | - | - | - | - | - | - |
| cfaB | - | - | - | - | - | - | - | - | - |
| cfaC | - | - | - | - | - | - | - | - | - |
| cfaD/cfaE | - | - | - | - | - | - | - | - | - |
| Curli fibers | cgsD | - | - | - | - | - | - | - | ECVR50_1136 | - |
| cgsE | - | - | - | - | - | - | - | ECVR50_1135 | - |
| cgsF | - | - | - | - | - | - | - | ECVR50_1134 | - |
| cgsG | - | - | - | - | - | - | - | ECVR50_1133 | - |
| csgA | - | - | - | - | - | - | - | ECVR50_1139 | - |
| csgB | - | - | - | - | - | - | - | ECVR50_1138 | - |
| csgC | - | - | - | - | - | - | - | ECVR50_1140 | - |
| Dispersin | aap | - | - | - | - | - | - | - | - | - |

| **VFclass** | **Virulence factors** | | **Related genes** | | **MS6396(Prediction)** | | **E.coli 55989(EAEC)** | | | | **E.coli CFT073(UPEC)** | | **E.coli NA114(UPEC)** | | **E.coli O157:H7 str. EDL933(EHEC)** | | | | **E.coli O25b:H4-ST131(UPEC)** | | **E.coliO44:H18042(EAEC)** | | |
| --- | --- | --- | --- | --- | --- | --- | --- | --- | --- | --- | --- | --- | --- | --- | --- | --- | --- | --- | --- | --- | --- | --- | --- |
| **draft (draft)** | | **55989p (NC_011752)** | | **chromosome (NC_011748)** | | **chromosome (NC_004431)** | | **chromosome (NC_017644)** | | **pO157 (NC_007414)** | | **chromosome (NC_002655)** | | **chromosome (NZ_HG941718)** | | **chromosome (NC_017626)** | | **pAA (NC_017627)** |
| Adherence | E.colicommon pilus (ECP) | | ecpA | | orf00728 | | - | | EC55989_0297 | | c0404 | | ECNA114_0280 | | - | | Z0360 | | EC958_0438 | | EC042_0322 | | - |
| ecpB | | orf00729 | | - | | EC55989_0296 | | c0403 | | ECNA114_0279 | | - | | Z0359 | | EC958_0437 | | EC042_0321 | | - |
| ecpC | | orf00730 | | - | | EC55989_0295 | | c0402 | | ECNA114_0278 | | - | | Z0358 | | EC958_0436 | | EC042_0320 | | - |
| ecpD | | orf00731 | | - | | EC55989_0294 | | c0401 | | ECNA114_0277 | | - | | Z0357 | | EC958_0435 | | EC042_0319 | | - |
| ecpE | | orf00732 | |  | | EC55989_0293 | | c0400 | | ECNA114_0276 | | - | | Z0356 | | EC958_0434 | | EC042_0318 | | - |
| ecpR | | - | |  | | EC55989_0298 | | c0405 | | ECNA114_0281 | | - | | Z0361 | | EC958_0439 | | EC042_0323 | | - |
| E.coli laminin-binding fimbriae (ELF) | | elfA | | - | | - | | EC55989_0987 | | - | | - | | - | | Z1286 | | - | | - | | - |
| elfC | | - | | - | | EC55989_0989 | | - | | - | | - | | Z1288m | | - | | - | | - |
| elfD | | - | | - | | EC55989_0988 | | - | | - | | - | | Z1287 | | - | | - | | - |
| elfG | | - | | - | | EC55989_0990 | | - | | - | | - | | Z1290 | | - | | - | | - |
| EaeH | | eaeH | | orf00719 | | - | | EC55989_0302 | | c0415 | | ECNA114_0287 | | - | | Z0375 | | - | | EC042_0333 | | - |
| EtpA | | etpA | | - | | - | | - | | - | | - | | - | | - | | EC958_4099 | | - | | - |
| F1C fimbriae | | focA | | - | | - | | - | | c1239 | | - | | - | | - | | - | | - | | - |
| focC | | - | | - | | - | | c1241 | | - | | - | | - | | - | | - | | - |
| focD | | - | | - | | - | | c1242 | | - | | - | | - | | - | | - | | - |
| focF | | - | | - | | - | | c1243 | | - | | - | | - | | - | | - | | - |
| focG | | - | | - | | - | | c1244 | | - | | - | | - | | - | | - | | - |
| focH | | - | | - | | - | | c1245 | | - | | - | | - | | - | | - | | - |
| focI | | - | | - | | - | | c1240 | | - | | - | | - | | - | | - | | - |
| Hemorrhagic E.coli pilus (HCP) | | hcpA | | orf02518 | | - | | EC55989_0101 | | c0127 | | ECNA114_0099 | | - | | Z0118 | | EC958_0247 | | EC042_0106 | | - |
| hcpB | | orf02519 | | - | | EC55989_0100 | | c0126 | | ECNA114_0098 | | - | | Z0117 | | EC958_0246 | | EC042_0105 | | - |
| hcpC | | orf02520 | | - | | EC55989_0099 | | c0125 | | ECNA114_0097 | | - | | Z0116 | | EC958_0245 | | EC042_0104 | | - |
| Intimin | | eae | | - | | - | | - | | - | | - | | - | | Z5110 | | - | | - | | - |
| K88 fimbriae | | faeC | | - | | - | | - | | - | | - | | - | | - | | - | | - | | - |
| faeD | | - | | - | | - | | - | | - | | - | | - | | - | | - | | - |
| faeE | | - | | - | | - | | - | | - | | - | | - | | - | | - | | - |
| **VFclass** | **Virulence factors** | **Related genes** | | **MS6396(Prediction)** | | **E.coli O45:K1:H7 str. S88(NMEC)** | | | | **E.coli O83:H1 str. NRG 857C(AIEC)** | | | | **E.coli UM146(AIEC)** | | | | **E.coli VR50(UPEC)** | | | |
| **draft (draft)** | | **pECOS88 (NC_011747)** | | **chromosome (NC_011742)** | | **pO83_CORR (NC_017659)** | | **chromosome (NC_017634)** | | **plamsid pUM146 (NC_017630)** | | **chromosome (NC_017632)** | | **chromosome (NZ_CP011134)** | | **pVR50B (NZ_CP011136)** | |
| Adherence | E.colicommon pilus (ECP) | ecpA | | orf00728 | | - | | ECS88_0290 | | - | | NRG857_01385 | | - | | UM146_15880 | | ECVR50_0312 | | - | |
| ecpB | | orf00729 | | - | | ECS88_0289 | | - | | NRG857_01380 | | - | | UM146_15885 | | ECVR50_0311 | | - | |
| ecpC | | orf00730 | | - | | ECS88_0288 | | - | | NRG857_01375 | | - | | UM146_15890 | | ECVR50_0310 | | - | |
| ecpD | | orf00731 | | - | | ECS88_0287 | | - | | NRG857_01370 | | - | | UM146_15895 | | ECVR50_0309 | | - | |
| ecpE | | orf00732 | | - | | ECS88_0286 | | - | | NRG857_01365 | | - | | UM146_15900 | | ECVR50_0308 | | - | |
| ecpR | | - | | - | | ECS88_0291 | | - | | NRG857_01390 | | - | | UM146_15875 | | ECVR50_0313 | | - | |
| E.coli laminin-binding fimbriae (ELF) | elfA | | - | | - | | - | | - | | - | | - | | - | | ECVR50_0980 | | - | |
| elfC | | - | | - | | - | | - | | - | | - | | - | | ECVR50_0982 | | - | |
| elfD | | - | | - | | - | | - | | - | | - | | - | | ECVR50_0981 | | - | |
| elfG | | - | | - | | - | | - | | - | | - | | - | | ECVR50_0983 | | - | |
| EaeH | eaeH | | orf00719 | | - | | - | | - | | NRG857_01440 | | - | | UM146_15825 | | - | | - | |
| EtpA | etpA | | - | | - | | - | | - | | - | | - | | - | | - | | - | |
| F1C fimbriae | focA | | - | | - | | - | | - | | - | | - | | - | | - | | - | |
| focC | | - | | - | | - | | - | | - | | - | | - | | - | | - | |
| focD | | - | | - | | - | | - | | - | | - | | - | | - | | - | |
| focF | | - | | - | | - | | - | | - | | - | | - | | - | | - | |
| focG | | - | | - | | - | | - | | - | | - | | - | | - | | - | |
| focH | | - | | - | | - | | - | | - | | - | | - | | - | | - | |
| focI | | - | | - | | - | | - | | - | | - | | - | | - | | - | |
| Hemorrhagic E.coli pilus (HCP) | hcpA | | orf02518 | | - | | ECS88_0110 | | - | | NRG857_00540 | | - | | UM146_23320 | | ECVR50_0118 | | - | |
| hcpB | | orf02519 | | - | | ECS88_0109 | | - | | NRG857_00535 | | - | | UM146_23315 | | ECVR50_0117 | | - | |
| hcpC | | orf02520 | | - | | ECS88_0108 | | - | | NRG857_00530 | | - | | UM146_23310 | | ECVR50_0116 | | - | |
| Intimin | eae | | - | | - | | - | | - | | - | | - | | - | | - | | - | |
| K88 fimbriae | faeC | | - | | - | | - | | - | | - | | - | | - | | - | | - | |
| faeD | | - | | - | | - | | - | | - | | - | | - | | - | | - | |
| faeE | | - | | - | | - | | - | | - | | - | | - | | - | | - | |

| **VFclass** | **Virulence factors** | **Related genes** | **MS6396(Prediction)** | **E.coli 55989(EAEC)** | | **E.coli CFT073(UPEC)** | **E.coli NA114(UPEC)** | **E.coli O157:H7 str. EDL933(EHEC)** | | **E.coli O25b:H4-ST131(UPEC)** | **E.coliO44:H18042(EAEC)** | |
| --- | --- | --- | --- | --- | --- | --- | --- | --- | --- | --- | --- | --- |
| **draft (draft)** | **55989p (NC_011752)** | **chromosome (NC_011748)** | **chromosome (NC_004431)** | **chromosome (NC_017644)** | **pO157 (NC_007414)** | **chromosome (NC_002655)** | **chromosome (NZ_HG941718)** | **chromosome (NC_017626)** | **pAA (NC_017627)** |
| Adherence | K88 fimbriae | faeF | - | - | - | - | - | - | - | - | - | - |
| faeG | - | - | - | - | - | - | - | - | - | - |
| faeH | - | - | - | - | - | - | - | - | - | - |
| faeI | - | - | - | - | - | - | - | - | - | - |
| faeJ | - | - | - | - | - | - | - | - | - | - |
| P fimbriae | papA | - | - | - | c3592; c5188 | ECNA114_4659 | - | - | - | - | - |
| papB | - | - | - | c3592a; c5188a | - | - | - | - | - | - |
| papC | orf04441 | - | - | c3590; c5186 | ECNA114_4661 | - | - | - | - | - |
| papD | orf04440 | - | - | c3589; c5185 | ECNA114_4662 | - | - | - | - | - |
| papE | - | - | - | c3585; c5181 | ECNA114_4665 | - | - | - | - | - |
| papF | - | - | - | c3584; c5180 | ECNA114_4666 | - | - | - | - | - |
| papG | orf04438 | - | - | c3583; c5179 | ECNA114_4667 | - | - | - | - | - |
| papH | - | - | - | c3591; c5187 | ECNA114_4660 | - | - | - | - | - |
| papI | orf04024; orf04703 | - | - | c3593; c5189 | ECNA114_4742 | - | - | EC958_3262 | - | - |
| papJ | - | - | - | c3588; c5184 | - | - | - | - | - | - |
| papK | orf04439 | - | - | c3586; c5182 | ECNA114_4664 | - | - | - | - | - |
| papX | - | - | - | c3582 | - | - | - | EC958_3259 | - | - |
| Porcine attaching-effacing associated protein | paa | - | - | - | - | - | - | Z2053 | - | - | - |
| S fimbriae | sfaA | - | - | - | - | - | - | - | - | - | - |
| sfaB | - | - | - | - | - | - | - | - | - | - |
| sfaC | - | - | - | - | - | - | - | - | - | - |
| sfaD | - | - | - | - | - | - | - | - | - | - |
| sfaE | - | - | - | - | - | - | - | - | - | - |
| sfaF | - | - | - | - | - | - | - | - | - | - |
| sfaG | - | - | - | - | - | - | - | - | - | - |
| sfaH | - | - | - | - | - | - | - | - | - | - |
| **VFclass** | **Virulence factors** | **Related genes** | **MS6396(Prediction)** | **E.coli O45:K1:H7 str. S88(NMEC)** | | **E.coli O83:H1 str. NRG 857C(AIEC)** | | **E.coli UM146(AIEC)** | | **E.coli VR50(UPEC)** | |
| **draft (draft)** | **pECOS88 (NC_011747)** | **chromosome (NC_011742)** | **pO83_CORR (NC_017659)** | **chromosome (NC_017634)** | **plamsid pUM146 (NC_017630)** | **chromosome (NC_017632)** | **chromosome (NZ_CP011134)** | **pVR50B (NZ_CP011136)** |
| Adherence | K88 fimbriae | faeF | - | - | - | - | - | - | - | - | - |
| faeG | - | - | - | - | - | - | - | - | - |
| faeH | - | - | - | - | - | - | - | - | - |
| faeI | - | - | - | - | - | - | - | - | - |
| faeJ | - | - | - | - | - | - | - | - | - |
| P fimbriae | papA | - | - | ECS88_3265 | - | - | - | UM146_21685 | - | - |
| papB | - | - | ECS88_3266 | - | - | - | UM146_21690 | - | - |
| papC | orf04441 | - | ECS88_3263 | - | - | - | UM146_21675 | - | - |
| papD | orf04440 | - | ECS88_3262 | - | - | - | UM146_21670 | - | - |
| papE | - | - | ECS88_3259 | - | - | - | UM146_21655 | - | - |
| papF | - | - | ECS88_3258 | - | - | - | UM146_21650 | - | - |
| papG | orf04438 | - | ECS88_3257 | - | - | - | UM146_21645 | - | - |
| papH | - | - | ECS88_3264 | - | - | - | UM146_21680 | - | - |
| papI | orf04024; orf04703 | - | ECS88_3267 | - | - | - | UM146_21695 | ECVR50_3300 | - |
| papJ | - | - | ECS88_3261 | - | - | - | UM146_21665 | - | - |
| papK | orf04439 | - | ECS88_3260 | - | - | - | UM146_21660 | - | - |
| papX | - | - | ECS88_4713 | - | - | - | UM146_21640 | ECVR50_3290 | - |
| Porcine attaching-effacing associated protein | paa | - | - | - | - | - | - | - | - | - |
| S fimbriae | sfaA | - | - | - | - | - | - | UM146_12360 | - | - |
| sfaB | - | - | - | - | - | - | UM146_12365 | - | - |
| sfaC | - | - | - | - | - | - | UM146_12370 | - | - |
| sfaD | - | - | - | - | - | - | UM146_12355 | - | - |
| sfaE | - | - | - | - | - | - | UM146_12350 | - | - |
| sfaF | - | - | - | - | - | - | UM146_12345 | - | - |
| sfaG | - | - | - | - | - | - | UM146_12340 | - | - |
| sfaH | - | - | - | - | - | - | UM146_12330 | - | - |

| **VFclass** | **Virulence factors** | **Related genes** | | | **MS6396(Prediction)** | | | **E.coli 55989(EAEC)** | | | | | | **E.coli CFT073(UPEC)** | | | **E.coli NA114(UPEC)** | | | **E.coli O157:H7 str. EDL933(EHEC)** | | | | | | **E.coli O25b:H4-ST131(UPEC)** | | | **E.coliO44:H18042(EAEC)** | | | | |
| --- | --- | --- | --- | --- | --- | --- | --- | --- | --- | --- | --- | --- | --- | --- | --- | --- | --- | --- | --- | --- | --- | --- | --- | --- | --- | --- | --- | --- | --- | --- | --- | --- | --- |
| **draft (draft)** | | | **55989p (NC_011752)** | | | **chromosome (NC_011748)** | | | **chromosome (NC_004431)** | | | **chromosome (NC_017644)** | | | **pO157 (NC_007414)** | | | **chromosome (NC_002655)** | | | **chromosome (NZ_HG941718)** | | | **chromosome (NC_017626)** | | | **pAA (NC_017627)** | |
| Adherence | S fimbriae | sfaS | | | - | | | - | | | - | | | - | | | - | | | - | | | - | | | - | | | - | | | - | |
| ToxB | toxB | | | - | | | - | | | - | | | - | | | - | | | L7095 | | | - | | | - | | | - | | | - | |
| Type I fimbriae | fimA | | | orf00877 | | | - | | | - | | | c5393 | | | ECNA114_4559 | | | - | | | Z5912 | | | EC958_0045 | | | - | | | - | |
| fimB | | | - | | | - | | | - | | | c5391 | | | ECNA114_4556 | | | - | | | Z5910 | | | EC958_0043* | | | - | | | - | |
| fimC | | | orf00875 | | | - | | | - | | | c5395 | | | ECNA114_4561 | | | - | | | Z5914 | | | EC958_0047 | | | - | | | - | |
| fimD | | | orf00874; orf03950; orf04444 | | | - | | | EC55989_1637 | | | c5396 | | | ECNA114_4562 | | | - | | | Z5915 | | | EC958_0048 | | | EC042_1637 | | | - | |
| fimE | | | orf00878 | | | - | | | - | | | c5392 | | | ECNA114_4558 | | | - | | | Z5911 | | | EC958_0044 | | | - | | | - | |
| fimF | | | orf00873 | | | - | | | EC55989_1636 | | | c5397 | | | ECNA114_4563 | | | - | | | Z5916 | | | EC958_0049 | | | EC042_1636 | | | - | |
| fimG | | | orf00871 | | | - | | | EC55989_1635 | | | c5399 | | | ECNA114_4564 | | | - | | | Z5917 | | | EC958_0050 | | | EC042_1635 | | | - | |
| fimH | | | orf00870 | | | - | | | - | | | c5400 | | | ECNA114_4565 | | | - | | | Z5918 | | | EC958_0051 | | | - | | | - | |
| fimI | | | orf00876 | | | - | | | EC55989_4002 | | | c5394 | | | ECNA114_4560 | | | - | | | Z5913 | | | EC958_0046 | | | - | | | - | |
| Lateral flagella(Aeromonas) | flgC | | | orf00776 | | | - | | | - | | | - | | | - | | | - | | | - | | | - | | | - | | | - | |
| Autotransporter | AIDA-I type | tibA | | | - | | | - | | | - | | | - | | | - | | | - | | | - | | | - | | | - | | | - | |
| AIDA-I | aida | | | - | | | - | | | - | | | - | | | - | | | - | | | - | | | EC958_4121 | | | - | | | - | |
| AatA | aatA | | | - | | | - | | | - | | | - | | | - | | | - | | | - | | | - | | | - | | | - | |
| Antigen 43 | agn43 | | | orf04149 | | | - | | | EC55989_3357 | | | c1273; c3655 | | | ECNA114_4551 | | | - | | | - | | | EC958_3314 | | | - | | | - | |
| Cah | cah | | | - | | | - | | | - | | | - | | | - | | | - | | | Z1211; Z1651 | | | EC958_5138 | | | EC042_4803 | | | - | |
| Contact-dependent inhibition CDI system | cdiA | | | - | | | - | | | - | | | c0345 | | | - | | | - | | | - | | | - | | | - | | | - | |
| cdiB | | | - | | | - | | | - | | | - | | | - | | | - | | | - | | | - | | | - | | | - | |
| EhaA | ehaA | | | - | | | - | | | EC55989_0317 | | | - | | | - | | | - | | | Z0402 | | | - | | | EC042_0348 | | | - | |
| EhaB | ehaB | | | orf04096 | | | - | | | EC55989_0378 | | | - | | | - | | | - | | | Z0469 | | | EC958_0509 | | | EC042_0404 | | | - | |
| Enteroaggregative immunoglobulin repeat protein | air/eaeX | | | - | | | - | | | - | | | - | | | - | | | - | | | - | | | - | | | EC042_4012 | | | - | |
| EspC | espC | | | orf04633 | | | - | | | - | | | - | | | ECNA114_4310 | | | - | | | - | | | EC958_4614 | | | - | | | - | |
| EspI | espI | | | - | | | - | | | - | | | - | | | - | | | - | | | - | | | - | | | - | | | - | |
| EspP | espP | | | - | | | - | | | - | | | - | | | - | | | L7020 | | | - | | | - | | | - | | | - | |
| Pet | pet | | | - | | | - | | | EC55989_4682 | | | - | | | - | | | - | | | - | | | - | | | - | | | EC042_pAA035 | |
| **VFclass** | **Virulence factors** | **Related genes** | | | **MS6396(Prediction)** | | | **E.coli O45:K1:H7 str. S88(NMEC)** | | | | | | **E.coli O83:H1 str. NRG 857C(AIEC)** | | | | | | **E.coli UM146(AIEC)** | | | | | | **E.coli VR50(UPEC)** | | | | | |
| **draft (draft)** | | | **pECOS88 (NC_011747)** | | | **chromosome (NC_011742)** | | | **pO83_CORR (NC_017659)** | | | **chromosome (NC_017634)** | | | **plamsid pUM146 (NC_017630)** | | | **chromosome (NC_017632)** | | | **chromosome (NZ_CP011134)** | | | **pVR50B (NZ_CP011136)** | | |
| Adherence | S fimbriae | sfaS | | | - | | | - | | | - | | | - | | | - | | | - | | | UM146_12335 | | | - | | | - | | |
| ToxB | toxB | | | - | | | - | | | - | | | - | | | - | | | - | | | - | | | - | | | - | | |
| Type I fimbriae | fimA | | | orf00877 | | | - | | | ECS88_4932 | | | - | | | NRG857_21765 | | | - | | | UM146_22260 | | | ECVR50_4792 | | | - | | |
| fimB | | | - | | | - | | | ECS88_4930 | | | - | | | NRG857_21755 | | | - | | | UM146_22250 | | | ECVR50_4794 | | | - | | |
| fimC | | | orf00875 | | | - | | | ECS88_4934 | | | - | | | NRG857_21775 | | | - | | | UM146_22270 | | | ECVR50_4790 | | | - | | |
| fimD | | | orf00874; orf03950; orf04444 | | | - | | | ECS88_4935 | | | - | | | NRG857_21780 | | | - | | | UM146_22275 | | | ECVR50_4789 | | | - | | |
| fimE | | | orf00878 | | | - | | | ECS88_4931 | | | - | | | NRG857_21760 | | | - | | | UM146_22255 | | | ECVR50_4793 | | | - | | |
| fimF | | | orf00873 | | | - | | | ECS88_4936 | | | - | | | NRG857_21785 | | | - | | | UM146_22280 | | | ECVR50_4788 | | | - | | |
| fimG | | | orf00871 | | | - | | | ECS88_4937 | | | - | | | NRG857_21790 | | | - | | | UM146_22285 | | | ECVR50_4787 | | | - | | |
| fimH | | | orf00870 | | | - | | | ECS88_4938 | | | - | | | NRG857_21795 | | | - | | | UM146_22290 | | | ECVR50_4786 | | | - | | |
| fimI | | | orf00876 | | | - | | | ECS88_4933 | | | - | | | NRG857_21770 | | | - | | | UM146_22265 | | | ECVR50_4791 | | | - | | |
| Lateral flagella(Aeromonas) | flgC | | | orf00776 | | | - | | | - | | | - | | | - | | | - | | | - | | | - | | | - | | |
| Autotransporter | AIDA-I type | tibA | | | - | | | - | | | - | | | - | | | - | | | - | | | - | | | - | | | - | | |
| AIDA-I | aida | | | - | | | - | | | - | | | - | | | - | | | - | | | - | | | - | | | - | | |
| AatA | aatA | | | - | | | - | | | - | | | - | | | - | | | - | | | - | | | - | | | - | | |
| Antigen 43 | agn43 | | | orf04149 | | | - | | | - | | | - | | | - | | | - | | | - | | | ECVR50_2156; ECVR50_3268 | | | - | | |
| Cah | cah | | | - | | | - | | | ECS88_4891 | | | - | | | - | | | - | | | UM146_12220 | | | - | | | - | | |
| Contact-dependent inhibition CDI system | cdiA | | | - | | | - | | | - | | | - | | | - | | | - | | | UM146_21955 | | | - | | | - | | |
| cdiB | | | - | | | - | | | - | | | - | | | - | | | - | | | UM146_21960 | | | - | | | - | | |
| EhaA | ehaA | | | - | | | - | | | - | | | - | | | - | | | - | | | - | | | - | | | - | | |
| EhaB | ehaB | | | orf04096 | | | - | | | ECS88_0367 | | | - | | | NRG857_01740 | | | - | | | - | | | - | | | - | | |
| Enteroaggregative immunoglobulin repeat protein | air/eaeX | | | - | | | - | | | - | | | - | | | - | | | - | | | - | | | - | | | - | | |
| EspC | espC | | | orf04633 | | | - | | | - | | | - | | | - | | | - | | | - | | | - | | | - | | |
| EspI | espI | | | - | | | - | | | - | | | - | | | - | | | - | | | - | | | - | | | - | | |
| EspP | espP | | | - | | | - | | | - | | | - | | | - | | | - | | | - | | | - | | | - | | |
| Pet | pet | | | - | | | - | | | - | | | - | | | - | | | - | | | - | | | - | | | - | | |
| **VFclass** | **Virulence factors** | | **Related genes** | | | **MS6396(Prediction)** | | | **E.coli 55989(EAEC)** | | | | | | **E.coli CFT073(UPEC)** | | | **E.coli NA114(UPEC)** | | | **E.coli O157:H7 str. EDL933(EHEC)** | | | | | | **E.coli O25b:H4-ST131(UPEC)** | | | **E.coliO44:H18042(EAEC)** | | | |
| **draft (draft)** | | | **55989p (NC_011752)** | | | **chromosome (NC_011748)** | | | **chromosome (NC_004431)** | | | **chromosome (NC_017644)** | | | **pO157 (NC_007414)** | | | **chromosome (NC_002655)** | | | **chromosome (NZ_HG941718)** | | | **chromosome (NC_017626)** | | | **pAA (NC_017627)** |
| Autotransporter | Pic | | pic | | | - | | | - | | | EC55989_4660 | | | c0350 | | | - | | | - | | | - | | | - | | | EC042_4593 | | | - |
| Sat | | sat | | | orf02733 | | | pEC55989_0068* | | | - | | | c3619 | | | - | | | - | | | - | | | EC958_3278 | | | - | | | - |
| Temperature-sensitive hemagglutinin | | tsh | | | orf04446 | | | - | | | - | | | - | | | - | | | - | | | - | | | EC958_4611 | | | - | | | - |
| UpaG adhesin | | upaG/ehaG | | | orf01741 | | | - | | | EC55989_4069 | | | c4424 | | | ECNA114_3755 | | | - | | | Z5029 | | | EC958_4009 | | | EC042_3912 | | | - |
| UpaH | | upaH | | | - | | | - | | | - | | | - | | | - | | | - | | | - | | | EC958_1689 | | | - | | | - |
| Vacuolating autotransporter gene | | vat | | | - | | | pEC55989_0061*; pEC55989_0062* | | | - | | | c0393 | | | - | | | - | | | - | | | - | | | - | | | - |
| Invasion | Invasion of brain endothelial cells (Ibes) | | ibeA | | | - | | | - | | | - | | | - | | | - | | | - | | | - | | | - | | | - | | | - |
| ibeB | | | orf02670 | | | - | | | EC55989_0563 | | | c0658 | | | ECNA114_0503 | | | - | | | Z0711 | | | EC958_0679 | | | EC042_0606 | | | - |
| ibeC | | | orf02766 | | | - | | | EC55989_4437 | | | c4914 | | | ECNA114_4095 | | | L7028 | | | Z5513 | | | EC958_4441 | | | EC042_4330 | | | - |
| Tia/Hek | | tia | | | orf04466 | | | - | | | EC55989_4831 | | | - | | | ECNA114_4668 | | | - | | | - | | | - | | | EC042_3176 | | | - |
| Iron uptake | Aerobactin siderophore | | iucA | | | orf02727 | | | - | | | EC55989_4645 | | | c3627 | | | ECNA114_4701 | | | - | | | - | | | EC958_3271 | | | - | | | - |
| iucB | | | orf02728 | | | - | | | EC55989_4644 | | | c3626 | | | ECNA114_4700 | | | - | | | - | | | EC958_3272 | | | - | | | - |
| iucC | | | orf02729 | | | - | | | EC55989_4643 | | | c3625 | | | ECNA114_4699 | | | - | | | - | | | EC958_3273 | | | - | | | - |
| iucD | | | orf02730 | | | - | | | EC55989_4642 | | | c3624 | | | ECNA114_4698 | | | - | | | - | | | EC958_3274 | | | - | | | - |
| iutA | | | orf02731 | | | - | | | EC55989_4641 | | | c3623 | | | ECNA114_4697 | | | - | | | - | | | EC958_3275 | | | - | | | - |
| Hemin uptake | | chuA | | | orf03510 | | | - | | | - | | | c4308 | | | ECNA114_3618 | | | - | | | Z4911 | | | EC958_3903 | | | EC042_3795 | | | - |
| chuS | | | orf03509 | | | - | | | - | | | c4307 | | | ECNA114_3617 | | | - | | | Z4910 | | | EC958_3902 | | | EC042_3794 | | | - |
| chuT | | | orf03512 | | | - | | | - | | | c4313 | | | ECNA114_3621 | | | - | | | Z4913 | | | EC958_3905 | | | EC042_3796 | | | - |
| chuU | | | orf03516 | | | - | | | - | | | c4317 | | | ECNA114_3625 | | | - | | | Z4918 | | | EC958_3909 | | | EC042_3800 | | | - |
| chuW | | | orf03513 | | | - | | | - | | | c4314 | | | ECNA114_3622 | | | - | | | Z4914 | | | EC958_3906 | | | EC042_3797 | | | - |
| chuX | | | orf03514 | | | - | | | - | | | c4315 | | | ECNA114_3623 | | | - | | | Z4915 | | | EC958_3907 | | | EC042_3798 | | | - |
| chuY | | | orf03515 | | | - | | | - | | | c4316 | | | ECNA114_3624 | | | - | | | Z4917 | | | EC958_3908 | | | EC042_3799 | | | - |
| Iron-regulated element | | ireA | | | orf03554 | | | - | | | - | | | c5174 | | | ECNA114_4546 | | | - | | | - | | | - | | | - | | | - |
| Iron/managanease transport | | sitA | | | orf04108 | | | - | | | - | | | c1600 | | | ECNA114_1304 | | | - | | | - | | | EC958_5193 | | | EC042_1521 | | | - |
| sitB | | | orf04109 | | | - | | | - | | | c1599 | | | ECNA114_1303 | | | - | | | - | | | EC958_1391 | | | EC042_1520 | | | - |
| sitC | | | orf04110 | | | - | | | - | | | c1598 | | | ECNA114_1302 | | | - | | | - | | | EC958_1390 | | | EC042_1519 | | | - |
| **VFclass** | **Virulence factors** | | | **Related genes** | | | **MS6396(Prediction)** | | | **E.coli O45:K1:H7 str. S88(NMEC)** | | | | | | **E.coli O83:H1 str. NRG 857C(AIEC)** | | | | | | **E.coli UM146(AIEC)** | | | | | | **E.coli VR50(UPEC)** | | | | | |
| **draft (draft)** | | | **pECOS88 (NC_011747)** | | | **chromosome (NC_011742)** | | | **pO83_CORR (NC_017659)** | | | **chromosome (NC_017634)** | | | **plamsid pUM146 (NC_017630)** | | | **chromosome (NC_017632)** | | | **chromosome (NZ_CP011134)** | | | **pVR50B (NZ_CP011136)** | | |
| Autotransporter | Pic | | | pic | | | - | | | - | | | - | | | - | | | - | | | - | | | - | | | - | | | - | | |
| Sat | | | sat | | | orf02733 | | | - | | | - | | | - | | | - | | | - | | | - | | | ECVR50_3325 | | | - | | |
| Temperature-sensitive hemagglutinin | | | tsh | | | orf04446 | | | - | | | - | | | - | | | - | | | - | | | - | | | - | | | - | | |
| UpaG adhesin | | | upaG/ehaG | | | orf01741 | | | - | | | ECS88_4019 | | | - | | | NRG857_17920 | | | - | | | UM146_18175 | | | - | | | - | | |
| UpaH | | | upaH | | | - | | | - | | | - | | | - | | | - | | | - | | | - | | | - | | | - | | |
| Vacuolating autotransporter gene | | | vat | | | - | | | - | | | ECS88_0280 | | | - | | | NRG857_01335 | | | - | | | UM146_15930 | | | - | | | - | | |
| Invasion | Invasion of brain endothelial cells (Ibes) | | | ibeA | | | - | | | - | | | - | | | - | | | NRG857_21885 | | | - | | | UM146_22380 | | | - | | | - | | |
| ibeB | | | orf02670 | | | - | | | ECS88_0609 | | | - | | | NRG857_02570 | | | - | | | UM146_14655 | | | ECVR50_0563 | | | - | | |
| ibeC | | | orf02766 | | | - | | | ECS88_4410 | | | - | | | NRG857_19760 | | | - | | | UM146_20030 | | | ECVR50_4405 | | | - | | |
| Tia/Hek | | | tia | | | orf04466 | | | - | | | ECS88_3256 | | | - | | | - | | | - | | | UM146_21625 | | | - | | | - | | |
| Iron uptake | Aerobactin siderophore | | | iucA | | | orf02727 | | | pECS88_0013 | | | - | | | NRG857_30241 | | | - | | | - | | | - | | | ECVR50_3331 | | | - | | |
| iucB | | | orf02728 | | | pECS88_0012 | | | - | | | NRG857_30239 | | | - | | | - | | | - | | | ECVR50_3330 | | | - | | |
| iucC | | | orf02729 | | | pECS88_0011 | | | - | | | NRG857_30238 | | | - | | | - | | | - | | | ECVR50_3329 | | | - | | |
| iucD | | | orf02730 | | | pECS88_0010 | | | - | | | NRG857_30237 | | | - | | | - | | | - | | | ECVR50_3328 | | | - | | |
| iutA | | | orf02731 | | | pECS88_0009 | | | - | | | NRG857_30235 | | | - | | | - | | | - | | | ECVR50_3327 | | | - | | |
| Hemin uptake | | | chuA | | | orf03510 | | | - | | | ECS88_3913 | | | - | | | NRG857_17390 | | | - | | | UM146_17660 | | | - | | | - | | |
| chuS | | | orf03509 | | | - | | | ECS88_3912 | | | - | | | NRG857_17385 | | | - | | | UM146_17655 | | | - | | | - | | |
| chuT | | | orf03512 | | | - | | | ECS88_3914 | | | - | | | NRG857_17395 | | | - | | | UM146_17665 | | | - | | | - | | |
| chuU | | | orf03516 | | | - | | | ECS88_3918 | | | - | | | NRG857_17415 | | | - | | | UM146_17685 | | | - | | | - | | |
| chuW | | | orf03513 | | | - | | | ECS88_3915 | | | - | | | NRG857_17400 | | | - | | | UM146_17670 | | | - | | | - | | |
| chuX | | | orf03514 | | | - | | | ECS88_3916 | | | - | | | NRG857_17405 | | | - | | | UM146_17675 | | | - | | | - | | |
| chuY | | | orf03515 | | | - | | | ECS88_3917 | | | - | | | NRG857_17410 | | | - | | | UM146_17680 | | | - | | | - | | |
| Iron-regulated element | | | ireA | | | orf03554 | | | - | | | ECS88_3295 | | | - | | | - | | | - | | | - | | | - | | | - | | |
| Iron/managanease transport | | | sitA | | | orf04108 | | | pECS88_0022 | | | ECS88_1217 | | | - | | | NRG857_05895 | | | - | | | UM146_11305 | | | - | | | - | | |
| sitB | | | orf04109 | | | pECS88_0021 | | | ECS88_1216 | | | - | | | NRG857_05890 | | | - | | | UM146_11310 | | | - | | | - | | |
| sitC | | | orf04110 | | | pECS88_0020 | | | ECS88_1215 | | | - | | | NRG857_05885 | | | - | | | UM146_11315 | | | - | | | - | | |

| **VFclass** | **Virulence factors** | | | **Related genes** | | **MS6396(Prediction)** | | **E.coli 55989(EAEC)** | | | | **E.coli CFT073(UPEC)** | | **E.coli NA114(UPEC)** | | **E.coli O157:H7 str. EDL933(EHEC)** | | | | **E.coli O25b:H4-ST131(UPEC)** | | **E.coliO44:H18042(EAEC)** | | |
| --- | --- | --- | --- | --- | --- | --- | --- | --- | --- | --- | --- | --- | --- | --- | --- | --- | --- | --- | --- | --- | --- | --- | --- | --- |
| **draft (draft)** | | **55989p (NC_011752)** | | **chromosome (NC_011748)** | | **chromosome (NC_004431)** | | **chromosome (NC_017644)** | | **pO157 (NC_007414)** | | **chromosome (NC_002655)** | | **chromosome (NZ_HG941718)** | | **chromosome (NC_017626)** | | **pAA (NC_017627)** |
| Iron uptake | Iron/managanease transport | | | sitD | | orf04111 | | - | | - | | c1597 | | ECNA114_1301 | | - | | - | | EC958_1389 | | EC042_1518 | | - |
| Salmochelin siderophore | | | iroB | | - | | - | | - | | c1254 | | - | | - | | - | | - | | - | | - |
| iroC | | - | | - | | - | | c1253 | | - | | - | | - | | - | | - | | - |
| iroD | | - | | - | | - | | c1252 | | - | | - | | - | | - | | - | | - |
| iroE | | - | | - | | - | | c1251 | | - | | - | | - | | - | | - | | - |
| iroN | | - | | - | | - | | c1250 | | - | | - | | - | | - | | - | | - |
| Yersiniabactin siderophore | | | fyuA | | orf03042 | | - | | EC55989_2212 | | c2436 | | ECNA114_2050 | | - | | - | | EC958_2294 | | EC042_2218 | | - |
| irp1 | | orf03038 | | - | | EC55989_2208 | | c2429 | | ECNA114_20461 | | - | | - | | EC958_2290 | | EC042_2214 | | - |
| irp2 | | orf03037 | | - | | EC55989_2207 | | c2424 | | ECNA114_2045 | | - | | - | | EC958_2289 | | EC042_2213 | | - |
| ybtA | | orf03036 | | - | | EC55989_2206 | | c2423 | | ECNA114_2044 | | - | | - | | EC958_2288 | | EC042_2212 | | - |
| ybtE | | orf03041 | | - | | EC55989_2211 | | c2433 | | ECNA114_2049 | | - | | - | | EC958_2293 | | EC042_2217 | | - |
| ybtP | | orf03035 | | - | | EC55989_2205 | | c2422 | | ECNA114_2043 | | - | | - | | EC958_2287 | | EC042_2211 | | - |
| ybtQ | | - | | - | | EC55989_2204 | | c2421 | | ECNA114_2042 | | - | | - | | EC958_2286 | | EC042_2210 | | - |
| ybtS | | orf04449 | | - | | EC55989_2202 | | c2419 | | ECNA114_2040 | | - | | - | | EC958_2284 | | EC042_2208 | | - |
| ybtT | | orf03040 | | - | | EC55989_2210 | | c2432 | | ECNA114_2048 | | - | | - | | EC958_2292 | | EC042_2216 | | - |
| ybtU | | orf03039 | | - | | EC55989_2209 | | c2430 | | ECNA114_2047 | | - | | - | | EC958_2291 | | EC042_2215 | | - |
| ybtX | | orf04448 | | - | | EC55989_2203 | | c2420 | | ECNA114_2041 | | - | | - | | EC958_2285 | | EC042_2209 | | - |
| LEE-encoded TTSS effectors | EspB | | | espB | | - | | - | | - | | - | | - | | - | | Z5105 | | - | | - | | - |
| EspF | | | espF | | - | | - | | - | | - | | - | | - | | Z5100 | | - | | - | | - |
| EspG | | | espG | | - | | - | | - | | - | | - | | - | | Z5142 | | - | | - | | - |
| EspH | | | espH | | - | | - | | - | | - | | - | | - | | Z5115 | | - | | - | | - |
| Mitochondria-associated protein Map | | | map | | - | | - | | - | | - | | - | | - | | Z5113 | | - | | - | | - |
| SepZ/EspZ | | | sepZ | | - | | - | | - | | - | | - | | - | | Z5122 | | - | | - | | - |
| Tir | | | tir | | - | | - | | - | | - | | - | | - | | Z5112 | | - | | - | | - |
| Non-LEE encoded TTSS effectors | Cell-cycle-inhibitory factor Cif | | | cif | | - | | - | | - | | - | | - | | - | | - | | - | | - | | - |
| EspFu/TccP (Tir cytoskeleton coupling protein) | | | espFu/tccP | | - | | - | | - | | - | | - | | - | | Z3072 | | - | | - | | - |
| **VFclass** | **Virulence factors** | | | **Related genes** | | **MS6396(Prediction)** | | **E.coli O45:K1:H7 str. S88(NMEC)** | | | | **E.coli O83:H1 str. NRG 857C(AIEC)** | | | | **E.coli UM146(AIEC)** | | | | **E.coli VR50(UPEC)** | | | |
| **draft (draft)** | | **pECOS88 (NC_011747)** | | **chromosome (NC_011742)** | | **pO83_CORR (NC_017659)** | | **chromosome (NC_017634)** | | **plamsid pUM146 (NC_017630)** | | **chromosome (NC_017632)** | | **chromosome (NZ_CP011134)** | | **pVR50B (NZ_CP011136)** | |
| Iron uptake | Iron/managanease transport | | | sitD | | orf04111 | | pECS88_0019 | | ECS88_1214 | | - | | NRG857_05880 | | - | | UM146_11320 | | - | | - | |
| Salmochelin siderophore | | | iroB | | - | | pECS88_0128 | | - | | NRG857_30008 | | - | | - | | UM146_12295 | | - | | - | |
| iroC | | - | | pECS88_0127 | | - | | NRG857_30010 | | - | | - | | UM146_12300 | | - | | - | |
| iroD | | - | | pECS88_0126 | | - | | NRG857_30012 | | - | | - | | UM146_12305 | | - | | - | |
| iroE | | - | | pECS88_0125 | | - | | NRG857_30013 | | - | | - | | UM146_12310 | | - | | - | |
| iroN | | - | | pECS88_0124 | | - | | NRG857_30015 | | - | | - | | UM146_12315 | | - | | - | |
| Yersiniabactin siderophore | | | fyuA | | orf03042 | | - | | ECS88_2043 | | - | | NRG857_09915 | | - | | UM146_07260 | | ECVR50_2121 | | - | |
| irp1 | | orf03038 | | - | | ECS88_2038 | | - | | NRG857_09895 | | - | | UM146_07280 | | ECVR50_2117 | | - | |
| irp2 | | orf03037 | | - | | ECS88_2037 | | - | | NRG857_09890 | | - | | UM146_07285 | | ECVR50_2116 | | - | |
| ybtA | | orf03036 | | - | | ECS88_2036 | | - | | NRG857_09885 | | - | | UM146_07295 | | ECVR50_2115 | | - | |
| ybtE | | orf03041 | | - | | ECS88_2041 | | - | | NRG857_09910 | | - | | UM146_07265 | | ECVR50_2120 | | - | |
| ybtP | | orf03035 | | - | | ECS88_2035 | | - | | NRG857_09880 | | - | | UM146_07300 | | ECVR50_2114 | | - | |
| ybtQ | | - | | - | | ECS88_2034 | | - | | NRG857_09875 | | - | | UM146_07305 | | ECVR50_2113 | | - | |
| ybtS | | orf04449 | | - | | ECS88_2032 | | - | | NRG857_09865 | | - | | UM146_07315 | | ECVR50_2111 | | - | |
| ybtT | | orf03040 | | - | | ECS88_2040 | | - | | NRG857_09905 | | - | | UM146_07270 | | ECVR50_2119 | | - | |
| ybtU | | orf03039 | | - | | ECS88_2039 | | - | | NRG857_09900 | | - | | UM146_07275 | | ECVR50_2118 | | - | |
| ybtX | | orf04448 | | - | | ECS88_2033 | | - | | NRG857_09870 | | - | | UM146_07310 | | ECVR50_2112 | | - | |
| LEE-encoded TTSS effectors | EspB | | | espB | | - | | - | | - | | - | | - | | - | | - | | - | | - | |
| EspF | | | espF | | - | | - | | - | | - | | - | | - | | - | | - | | - | |
| EspG | | | espG | | - | | - | | - | | - | | - | | - | | - | | - | | - | |
| EspH | | | espH | | - | | - | | - | | - | | - | | - | | - | | - | | - | |
| Mitochondria-associated protein Map | | | map | | - | | - | | - | | - | | - | | - | | - | | - | | - | |
| SepZ/EspZ | | | sepZ | | - | | - | | - | | - | | - | | - | | - | | - | | - | |
| Tir | | | tir | | - | | - | | - | | - | | - | | - | | - | | - | | - | |
| Non-LEE encoded TTSS effectors | Cell-cycle-inhibitory factor Cif | | | cif | | - | | - | | - | | - | | - | | - | | - | | - | | - | |
| EspFu/TccP (Tir cytoskeleton coupling protein) | | | espFu/tccP | | - | | - | | - | | - | | - | | - | | - | | - | | - | |
| **VFclass** | | **Virulence factors** | **Related genes** | | **MS6396(Prediction)** | | **E.coli 55989(EAEC)** | | | | **E.coli CFT073(UPEC)** | | **E.coli NA114(UPEC)** | | **E.coli O157:H7 str. EDL933(EHEC)** | | | | **E.coli O25b:H4-ST131(UPEC)** | | **E.coliO44:H18042(EAEC)** | | | |
| **draft (draft)** | | **55989p (NC_011752)** | | **chromosome (NC_011748)** | | **chromosome (NC_004431)** | | **chromosome (NC_017644)** | | **pO157 (NC_007414)** | | **chromosome (NC_002655)** | | **chromosome (NZ_HG941718)** | | **chromosome (NC_017626)** | | **pAA (NC_017627)** | |
| Non-LEE encoded TTSS effectors | | EspG2 (EPEC EspC island) | espG2 | | - | | - | | - | | - | | - | | - | | - | | - | | - | | - | |
| EspJ | espJ | | - | | - | | - | | - | | - | | - | | Z3071 | | - | | - | | - | |
| EspK | espK | | - | | - | | - | | - | | - | | - | | Z1829 | | - | | - | | - | |
| EspL1 | espL1 | | - | | - | | - | | - | | - | | - | | Z2749 | | - | | - | | - | |
| EspL2 | espL2 | | - | | - | | - | | - | | - | | - | | Z4326 | | - | | - | | - | |
| EspL4 | espL4 | | - | | - | | - | | - | | - | | - | | Z5608 | | - | | - | | - | |
| EspM1 | espM1 | | - | | - | | - | | - | | - | | - | | Z2565 | | - | | - | | - | |
| EspM2 | espM2 | | - | | - | | - | | - | | - | | - | | Z3918 | | - | | - | | - | |
| EspN | espN | | - | | - | | - | | - | | - | | - | | Z1824 | | - | | - | | - | |
| EspO1-1 | espO1-1 | | - | | - | | - | | - | | - | | - | | - | | - | | - | | - | |
| EspO1-2 | espO1-2 | | - | | - | | - | | - | | - | | - | | - | | - | | - | | - | |
| EspR1 | espR1 | | - | | - | | - | | - | | - | | - | | Z2242 | | - | | - | | - | |
| EspR3 | espR3 | | - | | - | | - | | - | | - | | - | | Z3023 | | - | | - | | - | |
| EspR4 | espR4 | | - | | - | | - | | - | | - | | - | | Z3026 | | - | | - | | - | |
| EspV | espV | | - | | - | | - | | - | | - | | - | | Z1387 | | - | | - | | - | |
| EspW | espW | | - | | - | | - | | - | | - | | - | | Z3920 | | - | | - | | - | |
| EspX1 | espX1 | | - | | - | | - | | - | | - | | - | | Z0025 | | - | | - | | - | |
| EspX2 | espX2 | | - | | - | | - | | - | | - | | - | | Z1019 | | - | | - | | - | |
| EspX4 | espX4 | | - | | - | | - | | - | | - | | - | | Z5636 | | - | | - | | - | |
| EspX5 | espX5 | | - | | - | | - | | - | | - | | - | | Z5665 | | - | | - | | - | |
| EspX6 | espX6 | | - | | - | | - | | - | | - | | - | | Z5935 | | - | | - | | - | |
| EspX7 | espX7 | | - | | - | | - | | - | | - | | - | | Z1822 | | - | | - | | - | |
| EspY1 | espY1 | | - | | - | | - | | - | | - | | - | | Z0065 | | - | | - | | - | |
| EspY2 | espY2 | | - | | - | | - | | - | | - | | - | | Z0078 | | - | | - | | - | |
| EspY3 | espY3 | | - | | - | | - | | - | | - | | - | | Z0521 | | - | | - | | - | |
| EspY4 | espY4 | | - | | - | | - | | - | | - | | - | | Z5211 | | - | | - | | - | |
| **VFclass** | | **Virulence factors** | **Related genes** | | **MS6396(Prediction)** | | **E.coli O45:K1:H7 str. S88(NMEC)** | | | | **E.coli O83:H1 str. NRG 857C(AIEC)** | | | | **E.coli UM146(AIEC)** | | | | **E.coli VR50(UPEC)** | | | |
| **draft (draft)** | | **pECOS88 (NC_011747)** | | **chromosome (NC_011742)** | | **pO83_CORR (NC_017659)** | | **chromosome (NC_017634)** | | **plamsid pUM146 (NC_017630)** | | **chromosome (NC_017632)** | | **chromosome (NZ_CP011134)** | | **pVR50B (NZ_CP011136)** | |
| Non-LEE encoded TTSS effectors | | EspG2 (EPEC EspC island) | espG2 | | - | | - | | - | | - | | - | | - | | - | | - | | - | |
| EspJ | espJ | | - | | - | | - | | - | | - | | - | | - | | - | | - | |
| EspK | espK | | - | | - | | - | | - | | - | | - | | - | | - | | - | |
| EspL1 | espL1 | | - | | - | | - | | - | | - | | - | | - | | - | | - | |
| EspL2 | espL2 | | - | | - | | - | | - | | - | | - | | - | | - | | - | |
| EspL4 | espL4 | | - | | - | | - | | - | | - | | - | | - | | - | | - | |
| EspM1 | espM1 | | - | | - | | - | | - | | - | | - | | - | | - | | - | |
| EspM2 | espM2 | | - | | - | | - | | - | | - | | - | | - | | - | | - | |
| EspN | espN | | - | | - | | - | | - | | - | | - | | - | | - | | - | |
| EspO1-1 | espO1-1 | | - | | - | | - | | - | | - | | - | | - | | - | | - | |
| EspO1-2 | espO1-2 | | - | | - | | - | | - | | - | | - | | - | | - | | - | |
| EspR1 | espR1 | | - | | - | | - | | - | | - | | - | | - | | - | | - | |
| EspR3 | espR3 | | - | | - | | - | | - | | - | | - | | - | | - | | - | |
| EspR4 | espR4 | | - | | - | | - | | - | | - | | - | | - | | - | | - | |
| EspV | espV | | - | | - | | - | | - | | - | | - | | - | | - | | - | |
| EspW | espW | | - | | - | | - | | - | | - | | - | | - | | - | | - | |
| EspX1 | espX1 | | - | | - | | - | | - | | - | | - | | - | | - | | - | |
| EspX2 | espX2 | | - | | - | | - | | - | | - | | - | | - | | - | | - | |
| EspX4 | espX4 | | - | | - | | - | | - | | - | | - | | - | | - | | - | |
| EspX5 | espX5 | | - | | - | | - | | - | | - | | - | | - | | - | | - | |
| EspX6 | espX6 | | - | | - | | - | | - | | - | | - | | - | | - | | - | |
| EspX7 | espX7 | | - | | - | | - | | - | | - | | - | | - | | - | | - | |
| EspY1 | espY1 | | - | | - | | - | | - | | - | | - | | - | | - | | - | |
| EspY2 | espY2 | | - | | - | | - | | - | | - | | - | | - | | - | | - | |
| EspY3 | espY3 | | - | | - | | - | | - | | - | | - | | - | | - | | - | |
| EspY4 | espY4 | | - | | - | | - | | - | | - | | - | | - | | - | | - | |

| **VFclass** | **Virulence factors** | **Related genes** | **MS6396(Prediction)** | **E.coli 55989(EAEC)** | | **E.coli CFT073(UPEC)** | **E.coli NA114(UPEC)** | **E.coli O157:H7 str. EDL933(EHEC)** | | **E.coli O25b:H4-ST131(UPEC)** | **E.coliO44:H18042(EAEC)** | |
| --- | --- | --- | --- | --- | --- | --- | --- | --- | --- | --- | --- | --- |
| **draft (draft)** | **55989p (NC_011752)** | **chromosome (NC_011748)** | **chromosome (NC_004431)** | **chromosome (NC_017644)** | **pO157 (NC_007414)** | **chromosome (NC_002655)** | **chromosome (NZ_HG941718)** | **chromosome (NC_017626)** | **pAA (NC_017627)** |
| Non-LEE encoded TTSS effectors | EspY5 | espY5 | - | - | - | - | - | - | Z5214 | - | - | - |
| LifA/Efa1 | lifA/efa1 | - | - | - | - | - | - | Z4332; Z4333 | - | - | - |
| NleA | nleA | - | - | - | - | - | - | Z6024 | - | - | - |
| NleB1 | nleB1 | - | - | - | - | - | - | Z4328 | - | - | - |
| NleB2-1 | nleB2-1 | - | - | - | - | - | - | Z0985 | - | - | - |
| NleB2-2 | nleB2-2 | - | - | - | - | - | - | - | - | - | - |
| NleC | nleC | - | - | - | - | - | - | Z0986 | - | - | - |
| NleD | nleD | - | - | - | - | - | - | Z0990 | - | - | - |
| NleE-1 | nleE-1 | - | - | - | - | - | - | Z4329 | - | - | - |
| NleE-2 | nleE-2 | - | - | - | - | - | - | - | - | - | - |
| NleF | nleF | - | - | - | - | - | - | Z6020 | - | - | - |
| NleG-1 | nleG-1 | - | - | - | - | - | - | Z6010 | - | - | - |
| NleG-2 | nleG-2 | - | - | - | - | - | - | - | - | - | - |
| NleG-3 | nleG-3 | - | - | - | - | - | - | - | - | - | - |
| NleG2-2 | nleG2-2 | - | - | - | - | - | - | Z2339 | - | - | - |
| NleG2-3 | nleG2-3 | - | - | - | - | - | - | Z2149 | - | - | - |
| NleG2-4 | nleG2-4 | - | - | - | - | - | - | Z2075 | - | - | - |
| NleG5-1 | nleG5-1 | - | - | - | - | - | - | Z2337 | - | - | - |
| NleG5-2 | nleG5-2 | - | - | - | - | - | - | Z2151 | - | - | - |
| NleG6-1 | nleG6-1 | - | - | - | - | - | - | Z2338 | - | - | - |
| NleG6-2 | nleG6-2 | - | - | - | - | - | - | Z2150 | - | - | - |
| NleG6-3 | nleG6-3 | - | - | - | - | - | - | Z3921 | - | - | - |
| NleG7 | nleG7 | - | - | - | - | - | - | Z2077 | - | - | - |
| NleG8-2 | nleG8-2 | - | - | - | - | - | - | Z3919 | - | - | - |
| NleH1-1 | nleH1-1 | - | - | - | - | - | - | Z0989 | - | - | - |
| NleH1-2 | nleH1-2 | - | - | - | - | - | - | Z6021 | - | - | - |
| **VFclass** | **Virulence factors** | **Related genes** | **MS6396(Prediction)** | **E.coli O45:K1:H7 str. S88(NMEC)** | | **E.coli O83:H1 str. NRG 857C(AIEC)** | | **E.coli UM146(AIEC)** | | **E.coli VR50(UPEC)** | |
| **draft (draft)** | **pECOS88 (NC_011747)** | **chromosome (NC_011742)** | **pO83_CORR (NC_017659)** | **chromosome (NC_017634)** | **plamsid pUM146 (NC_017630)** | **chromosome (NC_017632)** | **chromosome (NZ_CP011134)** | **pVR50B (NZ_CP011136)** |
| Non-LEE encoded TTSS effectors | EspY5 | espY5 | - | - | - | - | - | - | - | - | - |
| LifA/Efa1 | lifA/efa1 | - | - | - | - | - | - | - | - | - |
| NleA | nleA | - | - | - | - | - | - | - | - | - |
| NleB1 | nleB1 | - | - | - | - | - | - | - | - | - |
| NleB2-1 | nleB2-1 | - | - | - | - | - | - | - | - | - |
| NleB2-2 | nleB2-2 | - | - | - | - | - | - | - | - | - |
| NleC | nleC | - | - | - | - | - | - | - | - | - |
| NleD | nleD | - | - | - | - | - | - | - | - | - |
| NleE-1 | nleE-1 | - | - | - | - | - | - | - | - | - |
| NleE-2 | nleE-2 | - | - | - | - | - | - | - | - | - |
| NleF | nleF | - | - | - | - | - | - | - | - | - |
| NleG-1 | nleG-1 | - | - | - | - | - | - | - | - | - |
| NleG-2 | nleG-2 | - | - | - | - | - | - | - | - | - |
| NleG-3 | nleG-3 | - | - | - | - | - | - | - | - | - |
| NleG2-2 | nleG2-2 | - | - | - | - | - | - | - | - | - |
| NleG2-3 | nleG2-3 | - | - | - | - | - | - | - | - | - |
| NleG2-4 | nleG2-4 | - | - | - | - | - | - | - | - | - |
| NleG5-1 | nleG5-1 | - | - | - | - | - | - | - | - | - |
| NleG5-2 | nleG5-2 | - | - | - | - | - | - | - | - | - |
| NleG6-1 | nleG6-1 | - | - | - | - | - | - | - | - | - |
| NleG6-2 | nleG6-2 | - | - | - | - | - | - | - | - | - |
| NleG6-3 | nleG6-3 | - | - | - | - | - | - | - | - | - |
| NleG7 | nleG7 | - | - | - | - | - | - | - | - | - |
| NleG8-2 | nleG8-2 | - | - | - | - | - | - | - | - | - |
| NleH1-1 | nleH1-1 | - | - | - | - | - | - | - | - | - |
| NleH1-2 | nleH1-2 | - | - | - | - | - | - | - | - | - |

| **VFclass** | **Virulence factors** | | **Related genes** | | | **MS6396(Prediction)** | | **E.coli 55989(EAEC)** | | | | | **E.coli CFT073(UPEC)** | | **E.coli NA114(UPEC)** | | **E.coli O157:H7 str. EDL933(EHEC)** | | | | | **E.coli O25b:H4-ST131(UPEC)** | | | **E.coliO44:H18042(EAEC)** | | | |
| --- | --- | --- | --- | --- | --- | --- | --- | --- | --- | --- | --- | --- | --- | --- | --- | --- | --- | --- | --- | --- | --- | --- | --- | --- | --- | --- | --- | --- |
| **draft (draft)** | | **55989p (NC_011752)** | | | **chromosome (NC_011748)** | | **chromosome (NC_004431)** | | **chromosome (NC_017644)** | | **pO157 (NC_007414)** | | **chromosome (NC_002655)** | | | **chromosome (NZ_HG941718)** | | | **chromosome (NC_017626)** | | **pAA (NC_017627)** | |
| Non-LEE encoded TTSS effectors | TccP2 | | tccP2 | | | - | | - | | | - | | - | | - | | - | | Z1385 | | | - | | | - | | - | |
| Regulation | AggR | | aggR | | | - | | pEC55989_0072 | | | - | | - | | - | | - | | - | | | - | | | - | | EC042_pAA052 | |
| ACE T6SS | AAI/SCI-II T6SS | | aaiA | | | - | | - | | | EC55989_3298 | | - | | - | | - | | - | | | - | | | EC042_4562 | | - | |
| aaiB | | | - | | - | | | EC55989_3297 | | - | | - | | - | | - | | | - | | | EC042_4563 | | - | |
| aaiC/hcp | | | - | | - | | | EC55989_3296 | | - | | - | | - | | - | | | - | | | EC042_4564 | | - | |
| aaiD | | | - | | - | | | EC55989_3295 | | - | | - | | - | | - | | | - | | | EC042_4565 | | - | |
| aaiE | | | - | | - | | | EC55989_3294 | | - | | - | | - | | - | | | - | | | EC042_4566 | | - | |
| aaiF | | | - | | - | | | EC55989_3293 | | - | | - | | - | | - | | | - | | | EC042_4568 | | - | |
| aaiH | | | - | | - | | | EC55989_3291 | | - | | - | | - | | - | | | - | | | EC042_4570 | | - | |
| aaiI | | | - | | - | | | EC55989_3290 | | - | | - | | - | | - | | | - | | | EC042_4571 | | - | |
| aaiJ | | | - | | - | | | EC55989_3289 | | - | | - | | - | | - | | | - | | | EC042_4572 | | - | |
| aaiK | | | - | | - | | | EC55989_3288 | | - | | - | | - | | - | | | - | | | EC042_4573 | | - | |
| aaiL | | | - | | - | | | EC55989_3287 | | - | | - | | - | | - | | | - | | | EC042_4574 | | - | |
| aaiM | | | - | | - | | | EC55989_3286 | | - | | - | | - | | - | | | - | | | EC042_4574A | | - | |
| aaiN | | | - | | - | | | EC55989_3285 | | - | | - | | - | | - | | | - | | | EC042_4575 | | - | |
| clpV/aaiP | | | - | | - | | | EC55989_3283 | | - | | - | | - | | - | | | - | | | EC042_4577 | | - | |
| icmF/aaiO | | | - | | - | | | EC55989_3284 | | - | | - | | - | | - | | | - | | | EC042_4576 | | - | |
| vgrG | | | - | | - | | | EC55989_3292 | | - | | - | | - | | - | | | - | | | EC042_4569 | | - | |
| ABC transporter for dispersin | | aatA | | | - | | pEC55989_0057 | | | - | | - | | - | | - | | - | | | - | | | - | | EC042_pAA008 | |
| aatB | | | - | | pEC55989_0056 | | | - | | - | | - | | - | | - | | | - | | | - | | EC042_pAA009 | |
| aatC | | | - | | pEC55989_0055 | | | - | | - | | - | | - | | - | | | - | | | - | | EC042_pAA010 | |
| aatD | | | - | | pEC55989_0054 | | | - | | - | | - | | - | | - | | | - | | | - | | EC042_pAA011 | |
| aatP | | | - | | pEC55989_0058 | | | - | | - | | - | | - | | - | | | - | | | - | | EC042_pAA007 | |
| ACE T6SS | | Undetermined | | | - | | - | | | EC55989_0229 | | - | | - | | - | | Z0260 | | | - | | | EC042_0221 | | - | |
| Undetermined | | | - | | - | | | - | | - | | - | | - | | - | | | - | | | - | | - | |
| aec11 | | | - | | - | | | - | | - | | - | | - | | - | | | - | | | - | | - | |
| **VFclass** | **Virulence factors** | | **Related genes** | | | **MS6396(Prediction)** | | **E.coli O45:K1:H7 str. S88(NMEC)** | | | | | **E.coli O83:H1 str. NRG 857C(AIEC)** | | | | **E.coli UM146(AIEC)** | | | | | **E.coli VR50(UPEC)** | | | | |
| **draft (draft)** | | **pECOS88 (NC_011747)** | | | **chromosome (NC_011742)** | | **pO83_CORR (NC_017659)** | | **chromosome (NC_017634)** | | **plamsid pUM146 (NC_017630)** | | **chromosome (NC_017632)** | | | **chromosome (NZ_CP011134)** | | | **pVR50B (NZ_CP011136)** | |
| Non-LEE encoded TTSS effectors | TccP2 | | tccP2 | | | - | | - | | | - | | - | | - | | - | | - | | | - | | | - | |
| Regulation | AggR | | aggR | | | - | | - | | | - | | - | | - | | - | | - | | | - | | | - | |
| ACE T6SS | AAI/SCI-II T6SS | | aaiA | | | - | | - | | | - | | - | | - | | - | | - | | | - | | | - | |
| aaiB | | | - | | - | | | - | | - | | - | | - | | - | | | - | | | - | |
| aaiC/hcp | | | - | | - | | | - | | - | | - | | - | | - | | | - | | | - | |
| aaiD | | | - | | - | | | - | | - | | - | | - | | - | | | - | | | - | |
| aaiE | | | - | | - | | | - | | - | | - | | - | | - | | | - | | | - | |
| aaiF | | | - | | - | | | - | | - | | - | | - | | - | | | - | | | - | |
| aaiH | | | - | | - | | | - | | - | | - | | - | | - | | | - | | | - | |
| aaiI | | | - | | - | | | - | | - | | - | | - | | - | | | - | | | - | |
| aaiJ | | | - | | - | | | - | | - | | - | | - | | - | | | - | | | - | |
| aaiK | | | - | | - | | | - | | - | | - | | - | | - | | | - | | | - | |
| aaiL | | | - | | - | | | - | | - | | - | | - | | - | | | - | | | - | |
| aaiM | | | - | | - | | | - | | - | | - | | - | | - | | | - | | | - | |
| aaiN | | | - | | - | | | - | | - | | - | | - | | - | | | - | | | - | |
| clpV/aaiP | | | - | | - | | | - | | - | | - | | - | | - | | | - | | | - | |
| icmF/aaiO | | | - | | - | | | - | | - | | - | | - | | - | | | - | | | - | |
| vgrG | | | - | | - | | | - | | - | | - | | - | | - | | | - | | | - | |
| ABC transporter for dispersin | | aatA | | | - | | - | | | - | | - | | - | | - | | - | | | - | | | - | |
| aatB | | | - | | - | | | - | | - | | - | | - | | - | | | - | | | - | |
| aatC | | | - | | - | | | - | | - | | - | | - | | - | | | - | | | - | |
| aatD | | | - | | - | | | - | | - | | - | | - | | - | | | - | | | - | |
| aatP | | | - | | - | | | - | | - | | - | | - | | - | | | - | | | - | |
| ACE T6SS | | Undetermined | | | - | | - | | | ECS88_0243 | | - | | NRG857_01135 | | - | | UM146_16180 | | | ECVR50_0248 | | | - | |
| Undetermined | | | - | | - | | | ECS88_0250 | | - | | NRG857_01180 | | - | | UM146_16140 | | | - | | | - | |
| aec11 | | | - | | - | | | ECS88_0251 | | - | | NRG857_01185 | | - | | UM146_16135 | | | - | | | - | |
| **VFclass** | **Virulence factors** | | **Related genes** | | | **MS6396(Prediction)** | | **E.coli 55989(EAEC)** | | | | | **E.coli CFT073(UPEC)** | | **E.coli NA114(UPEC)** | | **E.coli O157:H7 str. EDL933(EHEC)** | | | | | | **E.coli O25b:H4-ST131(UPEC)** | | | **E.coliO44:H18042(EAEC)** | | |
| **draft (draft)** | | **55989p (NC_011752)** | | **chromosome (NC_011748)** | | | **chromosome (NC_004431)** | | **chromosome (NC_017644)** | | **pO157 (NC_007414)** | | | **chromosome (NC_002655)** | | | **chromosome (NZ_HG941718)** | | | **chromosome (NC_017626)** | | **pAA (NC_017627)** |
| Secretion system | ACE T6SS | | aec14 | | | - | | - | | - | | | - | | - | | - | | | - | | | - | | | - | | - |
| aec15 | | | - | | - | | - | | | - | | - | | - | | | Z2262 | | | - | | | - | | - |
| aec16 | | | - | | - | | EC55989_0235 | | | - | | - | | - | | | Z0266 | | | - | | | EC042_0225 | | - |
| aec17 | | | - | | - | | EC55989_0233 | | | - | | - | | - | | | Z0264 | | | - | | | EC042_0224 | | - |
| aec18 | | | - | | - | | EC55989_0231 | | | - | | - | | - | | | Z0262 | | | - | | | EC042_0223 | | - |
| aec19 | | | - | | - | | EC55989_0230 | | | - | | - | | - | | | Z0261 | | | - | | | EC042_0222 | | - |
| aec22 | | | - | | - | | EC55989_0228 | | | - | | - | | - | | | Z0259 | | | - | | | EC042_0220 | | - |
| aec23 | | | - | | - | | EC55989_0227 | | | - | | - | | - | | | Z0258 | | | - | | | EC042_0219 | | - |
| aec24 | | | - | | - | | EC55989_0226 | | | - | | - | | - | | | Z0257 | | | - | | | EC042_0218 | | - |
| aec25 | | | - | | - | | EC55989_0225 | | | - | | - | | - | | | Z0256 | | | - | | | EC042_0217 | | - |
| aec26 | | | - | | - | | EC55989_0224 | | | - | | - | | - | | | Z0255 | | | - | | | EC042_0216 | | - |
| aec27/clpV | | | - | | - | | EC55989_0223 | | | - | | - | | - | | | Z0254 | | | - | | | EC042_0215 | | - |
| aec28 | | | - | | - | | EC55989_0222 | | | - | | - | | - | | | Z0253 | | | - | | | EC042_0214 | | - |
| aec29 | | | - | | - | | EC55989_0221 | | | - | | - | | - | | | Z0251 | | | - | | | EC042_0213 | | - |
| aec30 | | | - | | - | | EC55989_0220 | | | - | | - | | - | | | Z0250 | | | - | | | EC042_0212 | | - |
| aec31 | | | - | | - | | EC55989_0219 | | | - | | - | | - | | | Z0249 | | | - | | | EC042_0211 | | - |
| aec32 | | | - | | - | | EC55989_0218 | | | - | | - | | - | | | Z0248 | | | - | | | EC042_0210 | | - |
| aec7 | | | - | | - | | - | | | - | | - | | - | | | - | | | - | | | EC042_0235 | | - |
| aec8 | | | - | | - | | - | | | - | | - | | - | | | - | | | - | | | EC042_0234 | | - |
| LEE locus encoded TTSS | | Undetermined | | | - | | - | | - | | | - | | - | | - | | | Z5102 | | | - | | | - | | - |
| Undetermined | | | - | | - | | - | | | - | | - | | - | | | Z5121 | | | - | | | - | | - |
| Undetermined | | | - | | - | | - | | | - | | - | | - | | | Z5138 | | | - | | | - | | - |
| Undetermined | | | - | | - | | - | | | - | | - | | - | | | Z5139 | | | - | | | - | | - |
| Undetermined | | | - | | - | | - | | | - | | - | | - | | | Z5143 | | | - | | | - | | - |
| cesD2 | | | - | | - | | - | | | - | | - | | - | | | Z5104 | | | - | | | - | | - |
| cesD | | | - | | - | | - | | | - | | - | | - | | | Z5127 | | | - | | | - | | - |
| **VFclass** | **Virulence factors** | | **Related genes** | | | **MS6396(Prediction)** | | **E.coli O45:K1:H7 str. S88(NMEC)** | | | | | **E.coli O83:H1 str. NRG 857C(AIEC)** | | | | **E.coli UM146(AIEC)** | | | | | | **E.coli VR50(UPEC)** | | | | |
| **draft (draft)** | | **pECOS88 (NC_011747)** | | **chromosome (NC_011742)** | | | **pO83_CORR (NC_017659)** | | **chromosome (NC_017634)** | | **plamsid pUM146 (NC_017630)** | | | **chromosome (NC_017632)** | | | **chromosome (NZ_CP011134)** | | | **pVR50B (NZ_CP011136)** | |
| Secretion system | ACE T6SS | | aec14 | | | - | | - | | ECS88_0249 | | | - | | NRG857_01170 | | - | | | UM146_16145 | | | - | | | - | |
| aec15 | | | - | | - | | ECS88_0248 | | | - | | NRG857_01165 | | - | | | UM146_16150 | | | - | | | - | |
| aec16 | | | - | | - | | ECS88_0247 | | | - | | NRG857_01155 | | - | | | UM146_16160 | | | ECVR50_0257 | | | - | |
| aec17 | | | - | | - | | ECS88_0246 | | | - | | NRG857_01150 | | - | | | UM146_16165 | | | ECVR50_0252 | | | - | |
| aec18 | | | - | | - | | ECS88_0245 | | | - | | NRG857_01145 | | - | | | UM146_16170 | | | ECVR50_0250 | | | - | |
| aec19 | | | - | | - | | ECS88_0244 | | | - | | NRG857_01140 | | - | | | UM146_16175 | | | ECVR50_0249 | | | - | |
| aec22 | | | - | | - | | ECS88_0242 | | | - | | NRG857_01130 | | - | | | UM146_16185 | | | ECVR50_0247 | | | - | |
| aec23 | | | - | | - | | ECS88_0241 | | | - | | NRG857_01125 | | - | | | UM146_16190 | | | ECVR50_0246 | | | - | |
| aec24 | | | - | | - | | ECS88_0240 | | | - | | NRG857_01120 | | - | | | UM146_16195 | | | ECVR50_0245 | | | - | |
| aec25 | | | - | | - | | ECS88_0239 | | | - | | NRG857_01115 | | - | | | UM146_16200 | | | ECVR50_0244 | | | - | |
| aec26 | | | - | | - | | ECS88_0238 | | | - | | NRG857_01110 | | - | | | UM146_16205 | | | ECVR50_0243 | | | - | |
| aec27/clpV | | | - | | - | | ECS88_0237 | | | - | | NRG857_01105 | | - | | | UM146_16210 | | | ECVR50_0242 | | | - | |
| aec28 | | | - | | - | | ECS88_0236 | | | - | | NRG857_01100 | | - | | | UM146_16215 | | | ECVR50_0241 | | | - | |
| aec29 | | | - | | - | | ECS88_0235 | | | - | | NRG857_01095 | | - | | | UM146_16220 | | | ECVR50_0240 | | | - | |
| aec30 | | | - | | - | | ECS88_0234 | | | - | | NRG857_01090 | | - | | | UM146_16225 | | | ECVR50_0239 | | | - | |
| aec31 | | | - | | - | | ECS88_0233 | | | - | | NRG857_01085 | | - | | | - | | | ECVR50_0238 | | | - | |
| aec32 | | | - | | - | | ECS88_0232 | | | - | | NRG857_01080 | | - | | | UM146_16240 | | | ECVR50_0237 | | | - | |
| aec7 | | | - | | - | | ECS88_0255 | | | - | | NRG857_01205 | | - | | | UM146_16115 | | | - | | | - | |
| aec8 | | | - | | - | | ECS88_0254 | | | - | | NRG857_01200 | | - | | | UM146_16120 | | | - | | | - | |
| LEE locus encoded TTSS | | Undetermined | | | - | | - | | - | | | - | | - | | - | | | - | | | - | | | - | |
| Undetermined | | | - | | - | | - | | | - | | - | | - | | | - | | | - | | | - | |
| Undetermined | | | - | | - | | - | | | - | | - | | - | | | - | | | - | | | - | |
| Undetermined | | | - | | - | | - | | | - | | - | | - | | | - | | | - | | | - | |
| Undetermined | | | - | | - | | - | | | - | | - | | - | | | - | | | - | | | - | |
| cesD2 | | | - | | - | | - | | | - | | - | | - | | | - | | | - | | | - | |
| cesD | | | - | | - | | - | | | - | | - | | - | | | - | | | - | | | - | |
| **VFclass** | | **Virulence factors** | | **Related genes** | **MS6396(Prediction)** | | **E.coli 55989(EAEC)** | | | | | **E.coli CFT073(UPEC)** | | **E.coli NA114(UPEC)** | | **E.coli O157:H7 str. EDL933(EHEC)** | | | | | **E.coli O25b:H4-ST131(UPEC)** | | | **E.coliO44:H18042(EAEC)** | | | | |
| **draft (draft)** | | **55989p (NC_011752)** | | **chromosome (NC_011748)** | | | **chromosome (NC_004431)** | | **chromosome (NC_017644)** | | **pO157 (NC_007414)** | | **chromosome (NC_002655)** | | | **chromosome (NZ_HG941718)** | | | **chromosome (NC_017626)** | | | **pAA (NC_017627)** | |
| Secretion system | | LEE locus encoded TTSS | | cesF | - | | - | | - | | | - | | - | | - | | Z5114 | | | - | | | - | | | - | |
| cesT | - | | - | | - | | | - | | - | | - | | Z5111 | | | - | | | - | | | - | |
| escC | - | | - | | - | | | - | | - | | - | | Z5126 | | | - | | | - | | | - | |
| escD | - | | - | | - | | | - | | - | | - | | Z5109 | | | - | | | - | | | - | |
| escF | - | | - | | - | | | - | | - | | - | | Z5103 | | | - | | | - | | | - | |
| escI | - | | - | | - | | | - | | - | | - | | Z5123 | | | - | | | - | | | - | |
| escJ | - | | - | | - | | | - | | - | | - | | Z5124 | | | - | | | - | | | - | |
| escK | - | | - | | - | | | - | | - | | - | | Z5137 | | | - | | | - | | | - | |
| escL | - | | - | | - | | | - | | - | | - | | Z5136 | | | - | | | - | | | - | |
| escN | - | | - | | - | | | - | | - | | - | | Z5119 | | | - | | | - | | | - | |
| escO | - | | - | | - | | | - | | - | | - | | Z5118 | | | - | | | - | | | - | |
| escP | - | | - | | - | | | - | | - | | - | | Z5117 | | | - | | | - | | | - | |
| escR | - | | - | | - | | | - | | - | | - | | Z5135 | | | - | | | - | | | - | |
| escS | - | | - | | - | | | - | | - | | - | | Z5134 | | | - | | | - | | | - | |
| escT | - | | - | | - | | | - | | - | | - | | Z5133 | | | - | | | - | | | - | |
| escU | - | | - | | - | | | - | | - | | - | | Z5132 | | | - | | | - | | | - | |
| escV | - | | - | | - | | | - | | - | | - | | Z5120 | | | - | | | - | | | - | |
| espA | - | | - | | - | | | - | | - | | - | | Z5107 | | | - | | | - | | | - | |
| espB | - | | - | | - | | | - | | - | | - | | Z5105 | | | - | | | - | | | - | |
| espD | - | | - | | - | | | - | | - | | - | | Z5106 | | | - | | | - | | | - | |
| etgA | - | | - | | - | | | - | | - | | - | | Z5131 | | | - | | | - | | | - | |
| glrA | - | | - | | - | | | - | | - | | - | | Z5128 | | | - | | | - | | | - | |
| glrR | - | | - | | - | | | - | | - | | - | | Z5129 | | | - | | | - | | | - | |
| ler | - | | - | | - | | | - | | - | | - | | Z5140 | | | - | | | - | | | - | |
| sepD | - | | - | | - | | | - | | - | | - | | Z5125 | | | - | | | - | | | - | |
| sepL | - | | - | | - | | | - | | - | | - | | Z5108 | | | - | | | - | | | - | |
| **VFclass** | | **Virulence factors** | | **Related genes** | **MS6396(Prediction)** | | **E.coli O45:K1:H7 str. S88(NMEC)** | | | | | **E.coli O83:H1 str. NRG 857C(AIEC)** | | | | **E.coli UM146(AIEC)** | | | | | **E.coli VR50(UPEC)** | | | | | |
| **draft (draft)** | | **pECOS88 (NC_011747)** | | **chromosome (NC_011742)** | | | **pO83_CORR (NC_017659)** | | **chromosome (NC_017634)** | | **plamsid pUM146 (NC_017630)** | | **chromosome (NC_017632)** | | | **chromosome (NZ_CP011134)** | | | **pVR50B (NZ_CP011136)** | | |
| Secretion system | | LEE locus encoded TTSS | | cesF | - | | - | | - | | | - | | - | | - | | - | | | - | | | - | | |
| cesT | - | | - | | - | | | - | | - | | - | | - | | | - | | | - | | |
| escC | - | | - | | - | | | - | | - | | - | | - | | | - | | | - | | |
| escD | - | | - | | - | | | - | | - | | - | | - | | | - | | | - | | |
| escF | - | | - | | - | | | - | | - | | - | | - | | | - | | | - | | |
| escI | - | | - | | - | | | - | | - | | - | | - | | | - | | | - | | |
| escJ | - | | - | | - | | | - | | - | | - | | - | | | - | | | - | | |
| escK | - | | - | | - | | | - | | - | | - | | - | | | - | | | - | | |
| escL | - | | - | | - | | | - | | - | | - | | - | | | - | | | - | | |
| escN | - | | - | | - | | | - | | - | | - | | - | | | - | | | - | | |
| escO | - | | - | | - | | | - | | - | | - | | - | | | - | | | - | | |
| escP | - | | - | | - | | | - | | - | | - | | - | | | - | | | - | | |
| escR | - | | - | | - | | | - | | - | | - | | - | | | - | | | - | | |
| escS | - | | - | | - | | | - | | - | | - | | - | | | - | | | - | | |
| escT | - | | - | | - | | | - | | - | | - | | - | | | - | | | - | | |
| escU | - | | - | | - | | | - | | - | | - | | - | | | - | | | - | | |
| escV | - | | - | | - | | | - | | - | | - | | - | | | - | | | - | | |
| espA | - | | - | | - | | | - | | - | | - | | - | | | - | | | - | | |
| espB | - | | - | | - | | | - | | - | | - | | - | | | - | | | - | | |
| espD | - | | - | | - | | | - | | - | | - | | - | | | - | | | - | | |
| etgA | - | | - | | - | | | - | | - | | - | | - | | | - | | | - | | |
| glrA | - | | - | | - | | | - | | - | | - | | - | | | - | | | - | | |
| glrR | - | | - | | - | | | - | | - | | - | | - | | | - | | | - | | |
| ler | - | | - | | - | | | - | | - | | - | | - | | | - | | | - | | |
| sepD | - | | - | | - | | | - | | - | | - | | - | | | - | | | - | | |
| sepL | - | | - | | - | | | - | | - | | - | | - | | | - | | | - | | |

| **VFclass** | **Virulence factors** | | **Related genes** | | **MS6396(Prediction)** | | **E.coli 55989(EAEC)** | | | | **E.coli CFT073(UPEC)** | | **E.coli NA114(UPEC)** | | **E.coli O157:H7 str. EDL933(EHEC)** | | | | **E.coli O25b:H4-ST131(UPEC)** | | **E.coliO44:H18042(EAEC)** | | |
| --- | --- | --- | --- | --- | --- | --- | --- | --- | --- | --- | --- | --- | --- | --- | --- | --- | --- | --- | --- | --- | --- | --- | --- |
| **draft (draft)** | | **55989p (NC_011752)** | | **chromosome (NC_011748)** | | **chromosome (NC_004431)** | | **chromosome (NC_017644)** | | **pO157 (NC_007414)** | | **chromosome (NC_002655)** | | **chromosome (NZ_HG941718)** | | **chromosome (NC_017626)** | | **pAA (NC_017627)** |
| Secretion system | LEE locus encoded TTSS | | sepQ | | - | | - | | - | | - | | - | | - | | Z5116 | | - | | - | | - |
| SCI-I T6SS | | Undetermined | | orf03167 | | - | | EC55989_3340 | | c3385 | | ECNA114_2854 | | - | | - | | EC958_5031 | | EC042_4524 | | - |
| Undetermined | | orf03168 | | - | | EC55989_3339 | | c3386 | | ECNA114_2855 | | - | | - | | EC958_5032 | | EC042_4525 | | - |
| Undetermined | | orf03169 | | - | | EC55989_3338 | | c3387 | | ECNA114_2856 | | - | | - | | EC958_5033 | | EC042_4526 | | - |
| Undetermined | | orf03170 | | - | | EC55989_3337 | | c3388 | | ECNA114_28561 | | - | | - | | EC958_5034 | | EC042_4527 | | - |
| Undetermined | | orf03171 | | - | | EC55989_3336 | | c3389 | | ECNA114_2857 | | - | | - | | EC958_5035 | | EC042_4528 | | - |
| Undetermined | | orf03172 | | - | | EC55989_3335 | | c3391 | | ECNA114_2858 | | - | | - | | EC958_5036 | | EC042_4529 | | - |
| Undetermined | | orf03173 | | - | | EC55989_3334 | | c3392 | | ECNA114_2860 | | - | | - | | EC958_5037 | | EC042_4530 | | - |
| Undetermined | | - | | - | | EC55989_3333 | | - | | - | | - | | - | | - | | EC042_4531 | | - |
| Undetermined | | - | | - | | - | | - | | - | | - | | - | | - | | EC042_4532 | | - |
| Undetermined | | orf04553 | | - | | EC55989_3331 | | c3393 | | ECNA114_2861 | | - | | - | | EC958_3091; EC958_3095; EC958_3099 | | EC042_4533 | | - |
| Undetermined | | orf00031 | | - | | EC55989_3330 | | - | | - | | - | | - | | EC958_0639 | | EC042_4534 | | - |
| Undetermined | | - | | - | | EC55989_3329 | | - | | - | | - | | - | | EC958_0640 | | EC042_4535 | | - |
| Undetermined | | orf00030 | | - | | EC55989_3328 | | - | | - | | - | | - | | EC958_0641 | | EC042_4536 | | - |
| Undetermined | | - | | - | | EC55989_3327 | | c3396 | | - | | - | | - | | - | | EC042_4537 | | - |
| Undetermined | | - | | - | | EC55989_3326 | | - | | - | | - | | - | | - | | EC042_4538 | | - |
| Undetermined | | - | | - | | EC55989_3325 | | c3398 | | ECNA114_2867 | | - | | - | | - | | EC042_4539 | | - |
| Undetermined | | orf02866 | | - | | EC55989_3324 | | c3399 | | ECNA114_2868 | | - | | - | | EC958_3105 | | EC042_4540 | | - |
| Undetermined | | - | | - | | EC55989_3323 | | - | | - | | - | | - | | - | | EC042_4541 | | - |
| Undetermined | | orf02864 | | - | | EC55989_3322 | | c3400 | | ECNA114_2870 | | - | | - | | EC958_3109 | | EC042_4542 | | - |
| Undetermined | | orf02863 | | - | | EC55989_3321 | | - | | ECNA114_28701 | | - | | - | | EC958_5040 | | EC042_4543 | | - |
| Undetermined | | orf02861 | | - | | EC55989_3320 | | c3401 | | ECNA114_2871 | | - | | - | | EC958_5041 | | EC042_4544 | | - |
| Undetermined | | orf02860 | | - | | EC55989_3319 | | c3402 | | ECNA114_2872 | | - | | - | | EC958_5042 | | EC042_4545 | | - |
| Undetermined | | - | | - | | EC55989_3318 | | - | | - | | - | | - | | - | | EC042_4546 | | - |
| Undetermined | | - | | - | | EC55989_3317 | | - | | - | | - | | - | | - | | EC042_4547 | | - |
| Undetermined | | - | | - | | EC55989_3316 | | - | | - | | - | | - | | - | | EC042_4548 | | - |
| **VFclass** | **Virulence factors** | | **Related genes** | | **MS6396(Prediction)** | | **E.coli O45:K1:H7 str. S88(NMEC)** | | | | **E.coli O83:H1 str. NRG 857C(AIEC)** | | | | **E.coli UM146(AIEC)** | | | | **E.coli VR50(UPEC)** | | | |
| **draft (draft)** | | **pECOS88 (NC_011747)** | | **chromosome (NC_011742)** | | **pO83_CORR (NC_017659)** | | **chromosome (NC_017634)** | | **plamsid pUM146 (NC_017630)** | | **chromosome (NC_017632)** | | **chromosome (NZ_CP011134)** | | **pVR50B (NZ_CP011136)** | |
| Secretion system | LEE locus encoded TTSS | | sepQ | | - | | - | | - | | - | | - | | - | | - | | - | | - | |
| SCI-I T6SS | | Undetermined | | orf03167 | | - | | ECS88_3083 | | - | | NRG857_13785 | | - | | UM146_02495 | | - | | - | |
| Undetermined | | orf03168 | | - | | ECS88_3084 | | - | | NRG857_13790 | | - | | UM146_02490 | | - | | - | |
| Undetermined | | orf03169 | | - | | ECS88_3085 | | - | | NRG857_13795 | | - | | UM146_02485 | | - | | - | |
| Undetermined | | orf03170 | | - | | ECS88_3086 | | - | | NRG857_13800 | | - | | UM146_02480 | | - | | - | |
| Undetermined | | orf03171 | | - | | ECS88_3087 | | - | | NRG857_13805 | | - | | UM146_02475 | | - | | - | |
| Undetermined | | orf03172 | | - | | ECS88_3088 | | - | | NRG857_13810 | | - | | UM146_02470 | | - | | - | |
| Undetermined | | orf03173 | | - | | ECS88_3089 | | - | | NRG857_13815 | | - | | UM146_02465 | | - | | - | |
| Undetermined | | - | | - | | - | | - | | - | | - | | - | | - | | - | |
| Undetermined | | - | | - | | - | | - | | - | | - | | - | | - | | - | |
| Undetermined | | orf04553 | | - | | ECS88_3090 | | - | | NRG857_13820 | | - | | UM146_02460 | | - | | - | |
| Undetermined | | orf00031 | | - | | - | | - | | - | | - | | - | | - | | - | |
| Undetermined | | - | | - | | - | | - | | - | | - | | - | | - | | - | |
| Undetermined | | orf00030 | | - | | - | | - | | - | | - | | - | | - | | - | |
| Undetermined | | - | | - | | - | | - | | NRG857_13835 | | - | | UM146_02440 | | - | | - | |
| Undetermined | | - | | - | | - | | - | | - | | - | | - | | - | | - | |
| Undetermined | | - | | - | | ECS88_3097 | | - | | NRG857_13845 | | - | | UM146_02430 | | - | | - | |
| Undetermined | | orf02866 | | - | | ECS88_3098 | | - | | NRG857_13850 | | - | | UM146_02425 | | - | | - | |
| Undetermined | | - | | - | | - | | - | | - | | - | | - | | - | | - | |
| Undetermined | | orf02864 | | - | | ECS88_3102 | | - | | NRG857_13865 | | - | | UM146_02400 | | - | | - | |
| Undetermined | | orf02863 | | - | | ECS88_3103 | | - | | NRG857_13870 | | - | | UM146_02395 | | - | | - | |
| Undetermined | | orf02861 | | - | | ECS88_3104 | | - | | NRG857_13875 | | - | | UM146_02390 | | - | | - | |
| Undetermined | | orf02860 | | - | | ECS88_3105 | | - | | NRG857_13880 | | - | | UM146_02385 | | - | | - | |
| Undetermined | | - | | - | | - | | - | | - | | - | | - | | - | | - | |
| Undetermined | | - | | - | | - | | - | | - | | - | | - | | - | | - | |
| Undetermined | | - | | - | | - | | - | | - | | - | | - | | - | | - | |
| **VFclass** | **Virulence factors** | **Related genes** | | **MS6396(Prediction)** | | **E.coli 55989(EAEC)** | | | | **E.coli CFT073(UPEC)** | | **E.coli NA114(UPEC)** | | **E.coli O157:H7 str. EDL933(EHEC)** | | | | **E.coli O25b:H4-ST131(UPEC)** | | **E.coliO44:H18042(EAEC)** | | | |
| **draft (draft)** | | **55989p (NC_011752)** | | **chromosome (NC_011748)** | | **chromosome (NC_004431)** | | **chromosome (NC_017644)** | | **pO157 (NC_007414)** | | **chromosome (NC_002655)** | | **chromosome (NZ_HG941718)** | | **chromosome (NC_017626)** | | **pAA (NC_017627)** | |
| Secretion system | SCI-I T6SS | Undetermined | | - | | - | | - | | - | | - | | - | | - | | - | | EC042_4549 | | - | |
| Undetermined | | - | | - | | EC55989_3315 | | - | | - | | - | | - | | EC958_5043 | | EC042_4550 | | - | |
| Toxin | Alpha-hemolysin | hlyA | | - | | - | | - | | c3570 | | - | | L7048 | | - | | - | | - | | - | |
| hlyB | | - | | - | | - | | c3573 | | - | | L7049 | | - | | - | | - | | - | |
| hlyC | | - | | - | | - | | c3569 | | - | | L7047 | | - | | - | | - | | - | |
| hlyD | | - | | - | | - | | c3574 | | - | | L7050 | | - | | - | | - | | - | |
| Colicin-like Usp | usp | | orf02513 | | - | | - | | - | | ECNA114_0104 | | - | | - | | EC958_0252 | | - | | - | |
| Cytolethal distending toxin | cdtA | | - | | - | | - | | - | | - | | - | | - | | - | | - | | - | |
| cdtB | | - | | - | | - | | - | | - | | - | | - | | - | | - | | - | |
| cdtC | | - | | - | | - | | - | | - | | - | | - | | - | | - | | - | |
| Cytotoxic necrotizing factor 1 | cnf1 | | - | | - | | - | | - | | - | | - | | - | | - | | - | | - | |
| Enterotoxin 1 | set1A | | - | | - | | - | | - | | - | | - | | - | | - | | EC042_4593B | | - | |
| set1B | | - | | - | | - | | - | | - | | - | | - | | - | | EC042_4593A | | - | |
| Enterotoxin SenB/TieB | senB | | orf04323 | | - | | - | | - | | - | | - | | - | | - | | - | | - | |
| Heat-labile enterotoxin | eltA | | - | | - | | - | | - | | - | | - | | - | | - | | - | | - | |
| eltB | | - | | - | | - | | - | | - | | - | | - | | - | | - | | - | |
| Heat-stable enterotoxin 1 (EAST1) | astA | | - | | - | | - | | - | | - | | - | | - | | - | | - | | EC042_pAA040* | |
| Hemolysin/cytolysin A | hlyE/clyA | | orf02391 | | - | | - | | - | | - | | - | | Z1944 | | EC958_1421 | | EC042_1231 | | - | |
| Shiga-like toxin | stx1A | | - | | - | | - | | - | | - | | - | | Z3344 | | - | | - | | - | |
| stx1B | | - | | - | | - | | - | | - | | - | | Z3343 | | - | | - | | - | |
| stx2A | | - | | - | | - | | - | | - | | - | | Z1464 | | - | | - | | - | |
| stx2B | | - | | - | | - | | - | | - | | - | | Z1465 | | - | | - | | - | |

Table saved from VFDB (http://www.mgc.ac.cn/VFs/) [Fri Dec 27 08:47:01 2019]

| **VFclass** | **Virulence factors** | **Related genes** | **MS6396(Prediction)** | **E.coli O45:K1:H7 str. S88(NMEC)** | | **E.coli O83:H1 str. NRG 857C(AIEC)** | | **E.coli UM146(AIEC)** | | **E.coli VR50(UPEC)** | |
| --- | --- | --- | --- | --- | --- | --- | --- | --- | --- | --- | --- |
| **draft (draft)** | **pECOS88 (NC_011747)** | **chromosome (NC_011742)** | **pO83_CORR (NC_017659)** | **chromosome (NC_017634)** | **plamsid pUM146 (NC_017630)** | **chromosome (NC_017632)** | **chromosome (NZ_CP011134)** | **pVR50B (NZ_CP011136)** |
| Secretion system | SCI-I T6SS | Undetermined | - | - | - | - | - | - | - | - | - |
| Undetermined | - | - | - | - | NRG857_13885 | - | UM146_02380 | - | - |
| Toxin | Alpha-hemolysin | hlyA | - | - | - | - | - | - | UM146_21845 | - | - |
| hlyB | - | - | - | - | - | - | UM146_21840 | - | - |
| hlyC | - | - | - | - | - | - | UM146_21850 | - | - |
| hlyD | - | - | - | - | - | - | UM146_21835 | - | - |
| Colicin-like Usp | usp | orf02513 | - | ECS88_0115 | - | NRG857_00565 | - | UM146_23345 | - | - |
| Cytolethal distending toxin | cdtA | - | - | - | - | - | - | - | - | - |
| cdtB | - | - | - | - | - | - | - | - | - |
| cdtC | - | - | - | - | - | - | - | - | - |
| Cytotoxic necrotizing factor 1 | cnf1 | - | - | - | - | - | - | UM146_21825 | - | - |
| Enterotoxin 1 | set1A | - | - | - | - | - | - | - | - | - |
| set1B | - | - | - | - | - | - | - | - | - |
| Enterotoxin SenB/TieB | senB | orf04323 | - | - | - | - | UM146_24581 | - | - | ECVR50_B055 |
| Heat-labile enterotoxin | eltA | - | - | - | - | - | - | - | - | - |
| eltB | - | - | - | - | - | - | - | - | - |
| Heat-stable enterotoxin 1 (EAST1) | astA | - | - | - | - | - | - | - | - | - |
| Hemolysin/cytolysin A | hlyE/clyA | orf02391 | - | - | - | NRG857_06035* | - | UM146_11175* | ECVR50_1260 | - |
| Shiga-like toxin | stx1A | - | - | - | - | - | - | - | - | - |
| stx1B | - | - | - | - | - | - | - | - | - |
| stx2A | - | - | - | - | - | - | - | - | - |
| stx2B | - | - | - | - | - | - | - | - | - |

Table saved from VFDB (http://www.mgc.ac.cn/VFs/) [Fri Dec 27 08:47:01 2019]

**Supplemental Table**

Details of the pathogenesis-related genes of MS6396.
